# Supplementary material for: A gene-specific T2A-GAL4 library for Drosophila
Source: eLife journal article supplement (doi:10.7554/elife.35574), 2018-03-22
Supplement: supp [file elife-35574-supp-v1.zip]

Archive with 12 entries (12 files):
- elife_poa_e35574_Figure_4_figure_supplement_1.pdf
- elife_poa_e35574_Supplementary_File_2.xlsx
- elife_poa_e35574_Supplementary_File_3.docx
- elife_poa_e35574_Figure_5_figure_supplement_3.pdf
- elife_poa_e35574_Figure_2_figure_supplement_1.pdf
- elife_poa_e35574_Transparent_Reporting_File.pdf
- elife_poa_e35574_Figure_5_figure_supplement_1.pdf
- elife_poa_e35574_Figure_4_figure_supplement_2.pdf
- elife_poa_e35574_Figure_1_figure_supplement_2.pdf
- elife_poa_e35574_Figure_5_figure_supplement_2.pdf
- elife_poa_e35574_Figure_1_figure_supplement_1.pdf
- elife_poa_e35574_Supplementary_File_1.pptx
