# Supplementary material for: A gene-specific T2A-GAL4 library for Drosophila
Source: eLife journal article supplement (doi:10.7554/elife.35574), 2018-03-22
Supplement: supp [file elife-35574-supp-v1.zip › elife_poa_e35574_Figure_1_figure_supplement_1.pdf]

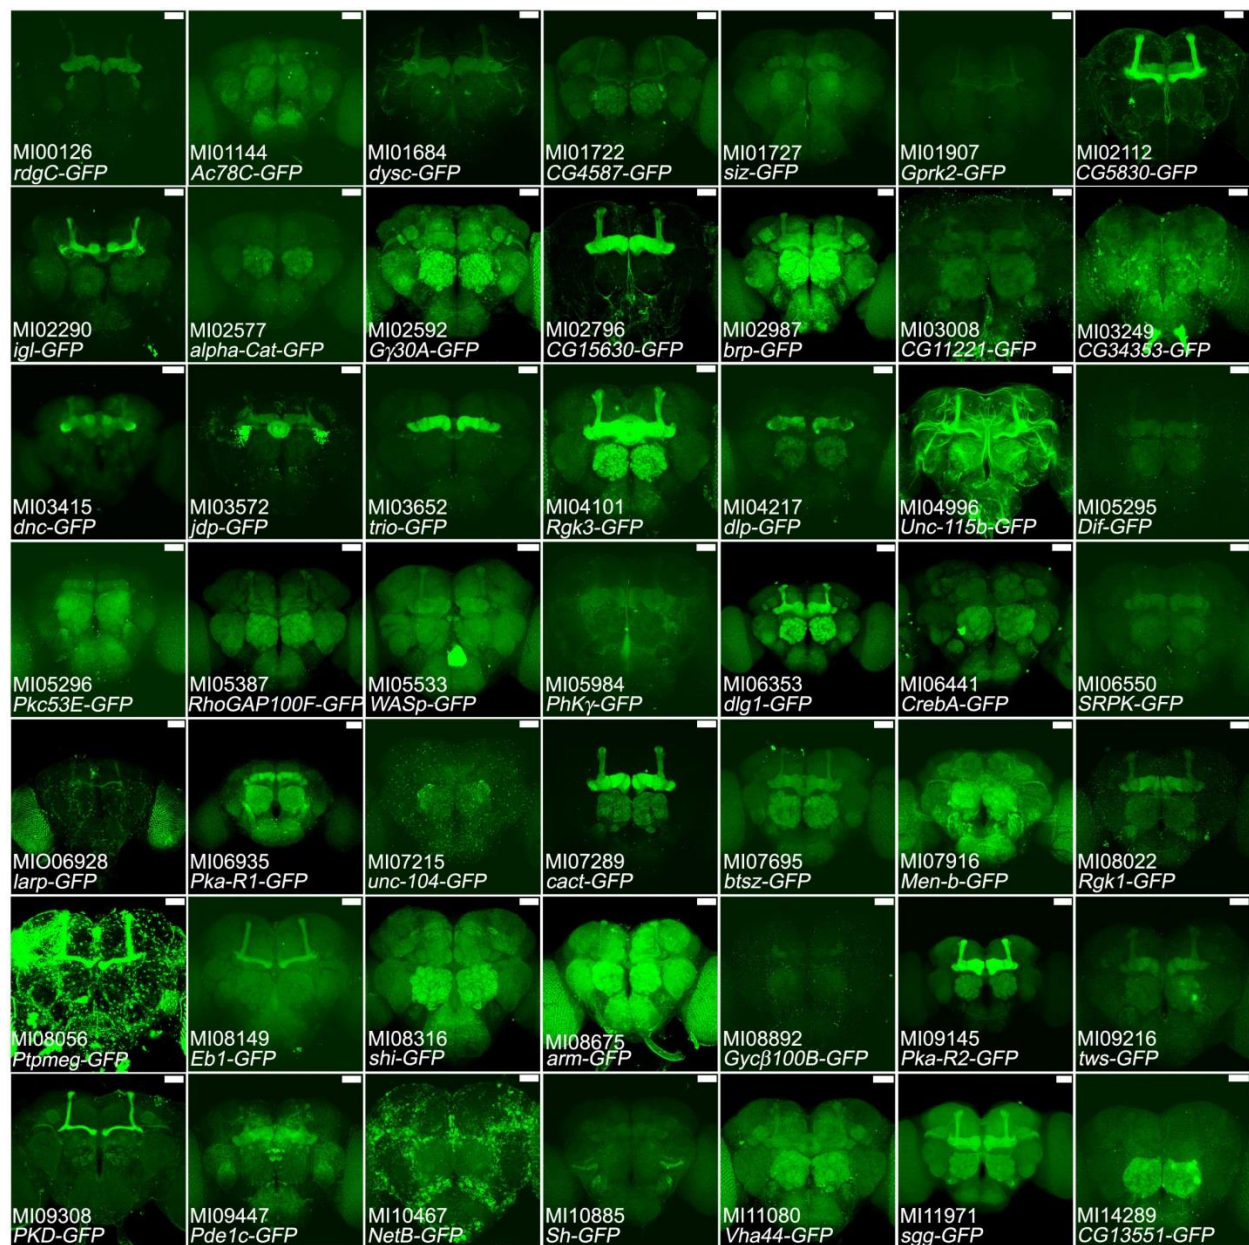

**Figure 1-figure supplement 1.** Expression of *MiMIC GFSTFs* tagged genes in adult brains. We document the expression patterns and protein localization associated with 49 genes. The MiMIC identification number and affected genes are shown. Note that only ~19% of all genes tested showed detectable GFP signals in adult brains. Images are available on Flypush (<http://flypush.imgen.bcm.tmc.edu/pscreen/rmce/>). Many patterns are in agreement with the expression patterns of published genes/proteins (e.g. *brp*, *Rgk1*, *dlg1*, *cact*). Green: GFSTF. Scale bar: 50  $\mu$ m.
