# Supplementary material for: A gene-specific T2A-GAL4 library for Drosophila
Source: eLife journal article supplement (doi:10.7554/elife.35574), 2018-03-22
Supplement: supp [file elife-35574-supp-v1.zip › elife_poa_e35574_Figure_4_figure_supplement_1.pdf]

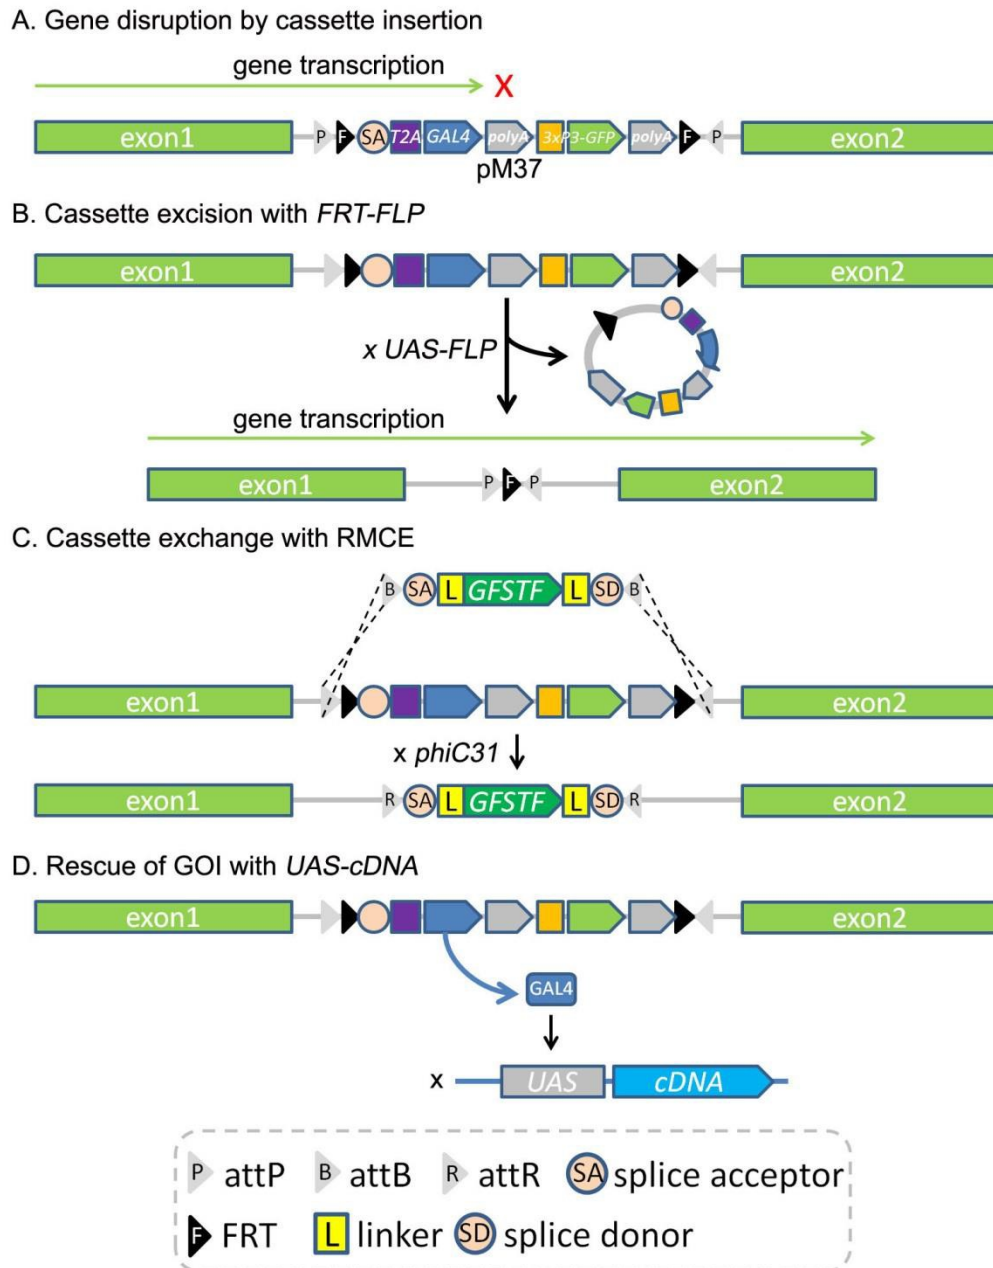

**Figure 4-figure supplement 1.** Applications of the CRIMIC technology. (A) The CRIMIC pM37 cassette contains *polyA* 3' of *GAL4* which will arrest transcription and typically generate a severe loss-of-function allele. (B) The lethality caused by *SA-T2A-GAL4-polyA* cassette insertion can often be reverted by cassette excision using the *FRT* sites at the ends of the cassette and FLP. (C) The inserted *SA-T2A-GAL4-polyA* cassette can be replaced with other DNA fragments containing two *attB* sites and *phiC31* integrase by RMCE such as *GFSTF*. (D) The *SA-T2A-GAL4-polyA* insertion produces *GAL4* that can be used to rescue the phenotype (lethality caused by the cassette insertion) with *UAS*-cDNA.
