# Supplementary material for: A gene-specific T2A-GAL4 library for Drosophila
Source: eLife journal article supplement (doi:10.7554/elife.35574), 2018-03-22
Supplement: supp [file elife-35574-supp-v1.zip › elife_poa_e35574_Figure_4_figure_supplement_2.pdf]

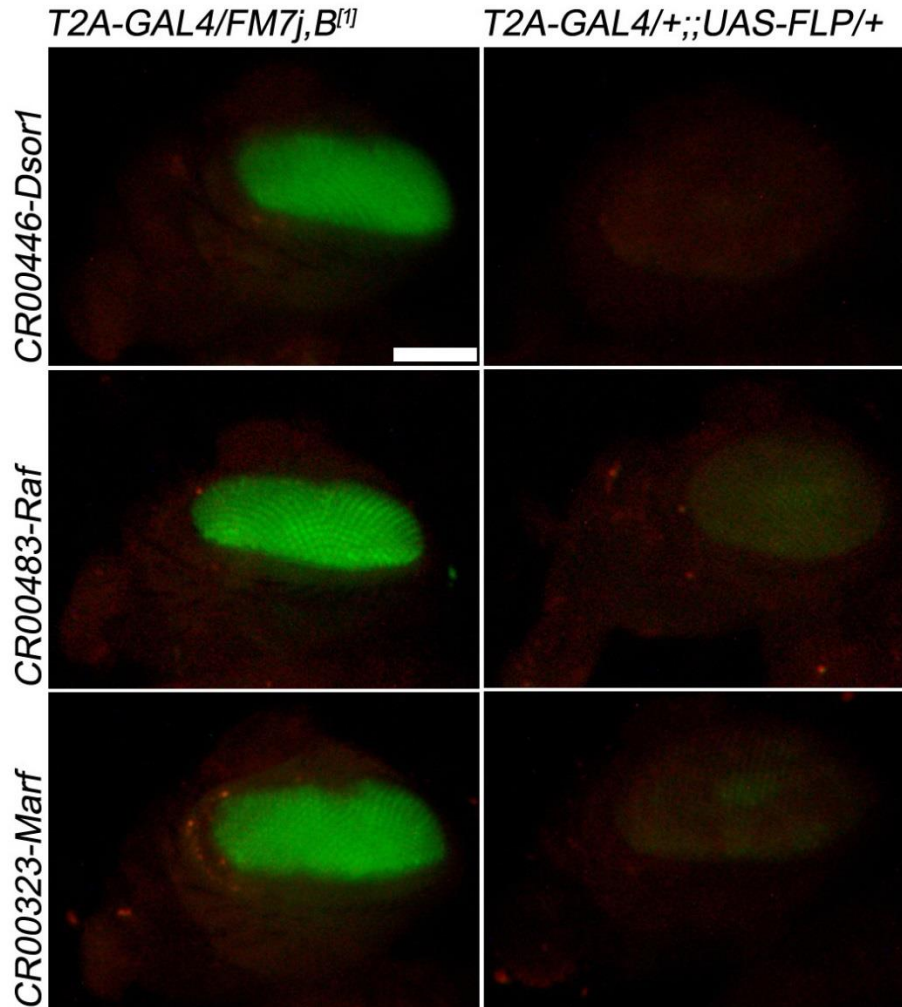

**Figure 4-figure supplement 2.** *T2A-GAL4* cassette excision upon *FRT-FLP*. CRIMIC *T2A-GAL4* cassette, pM37 contains two *FRT* sites. The cassettes in three genes (*Dsor1*, *Raf*, *Marf*) failed to revert the lethality when exposed to *UAS-FLP*. However, cassette excision is still effective based on the loss of the 3XP3 Eye-GFP in *Dsor1*; however, weak GFP expression remains in *Raf* and *Marf*. Left panel: CRIMIC *T2A-GAL4*s; Right panel: CRIMIC *T2A-GAL4*s > *UAS-FLP*. Scale bar: 0.2 mm.
