# Supplementary material for: A gene-specific T2A-GAL4 library for Drosophila
Source: eLife journal article supplement (doi:10.7554/elife.35574), 2018-03-22
Supplement: supp [file elife-35574-supp-v1.zip › elife_poa_e35574_Figure_5_figure_supplement_1.pdf]

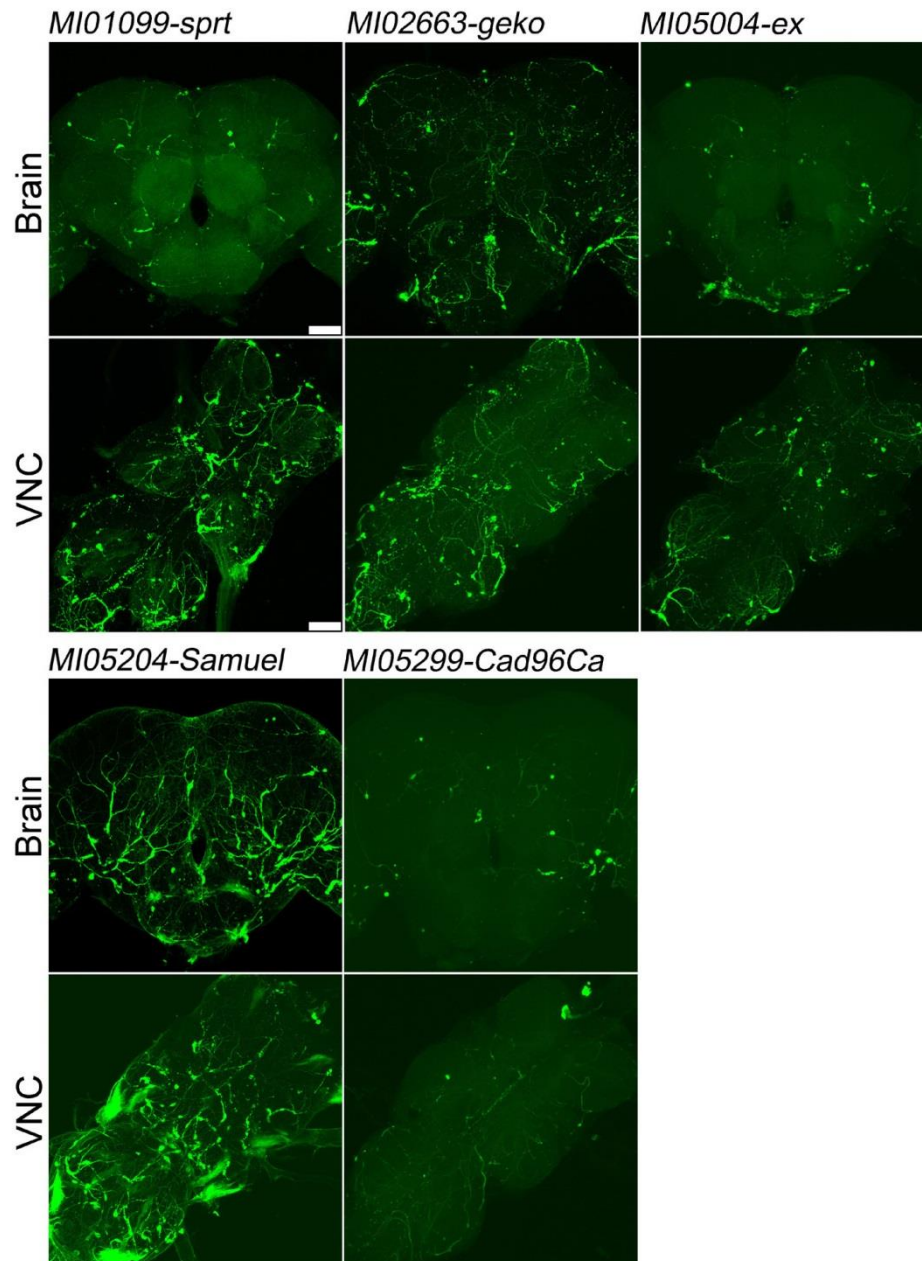

**Figure 5-figure supplement 1.** Genes specifically expressed in trachea. Five genes previously not reported to be expressed in trachea (*sprt*, *geko*, *ex*, *Samuel*, *Cad96Ca*). Expression in trachea in adult brains and VNC. MiMIC *T2A-GAL4s* were crossed with *UAS-mCD8::GFP* (green). Scale bar: 50  $\mu$ m.
