# Supplementary material for: A gene-specific T2A-GAL4 library for Drosophila
Source: eLife journal article supplement (doi:10.7554/elife.35574), 2018-03-22
Supplement: supp [file elife-35574-supp-v1.zip › elife_poa_e35574_Figure_5_figure_supplement_2.pdf]

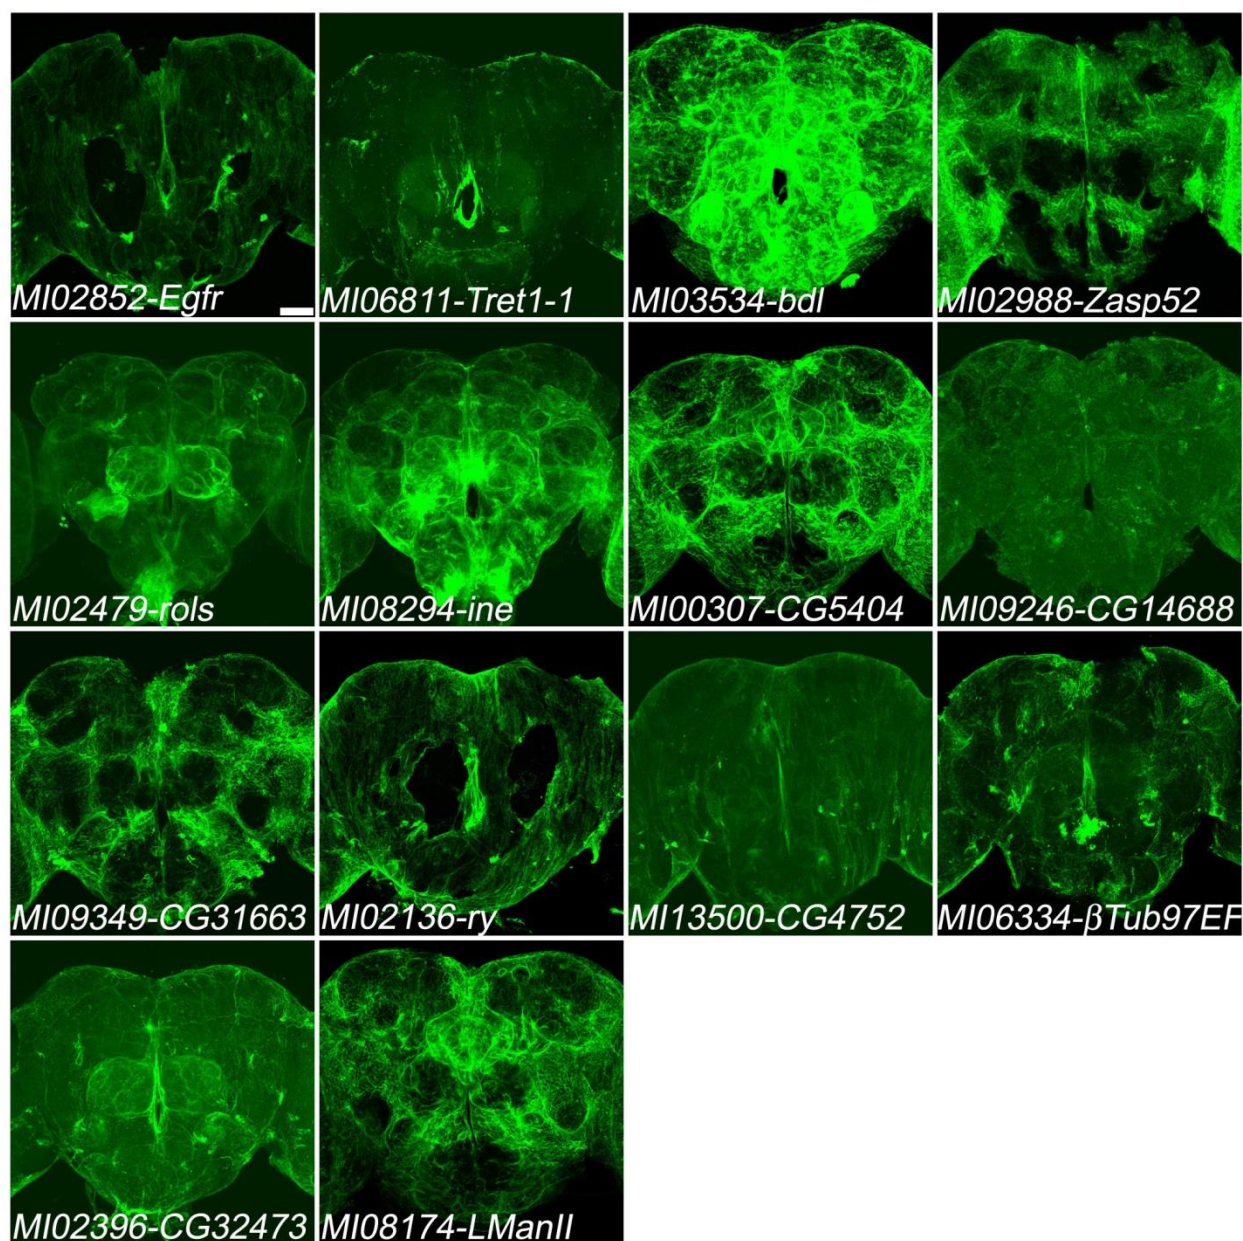

**Figure 5-figure supplement 2.** Genes expressed in glia. Two genes (*Egfr*, *Tret1-1*) previously documented to be expressed in glia and twelve genes not previously documented to be expressed in glia (*bdl*, *Zasp52*, *rols*, *ine*, *CG5404*, *CG14688*, *CG31663*, *ry*, *CG4752*, *βTub97EF*, *CG32473*, *LManII*) in adult brains. MiMIC T2A-*GAL4s* were crossed with *UAS-mCD8::GFP* (green). Note that the damages were caused by dissections in *MI02852-Egfr* and *MI02136-ry*. Scale bar: 50  $\mu$ m.
