# Supplementary material for: A gene-specific T2A-GAL4 library for Drosophila
Source: eLife journal article supplement (doi:10.7554/elife.35574), 2018-03-22
Supplement: supp [file elife-35574-supp-v1.zip › elife_poa_e35574_Figure_5_figure_supplement_3.pdf]

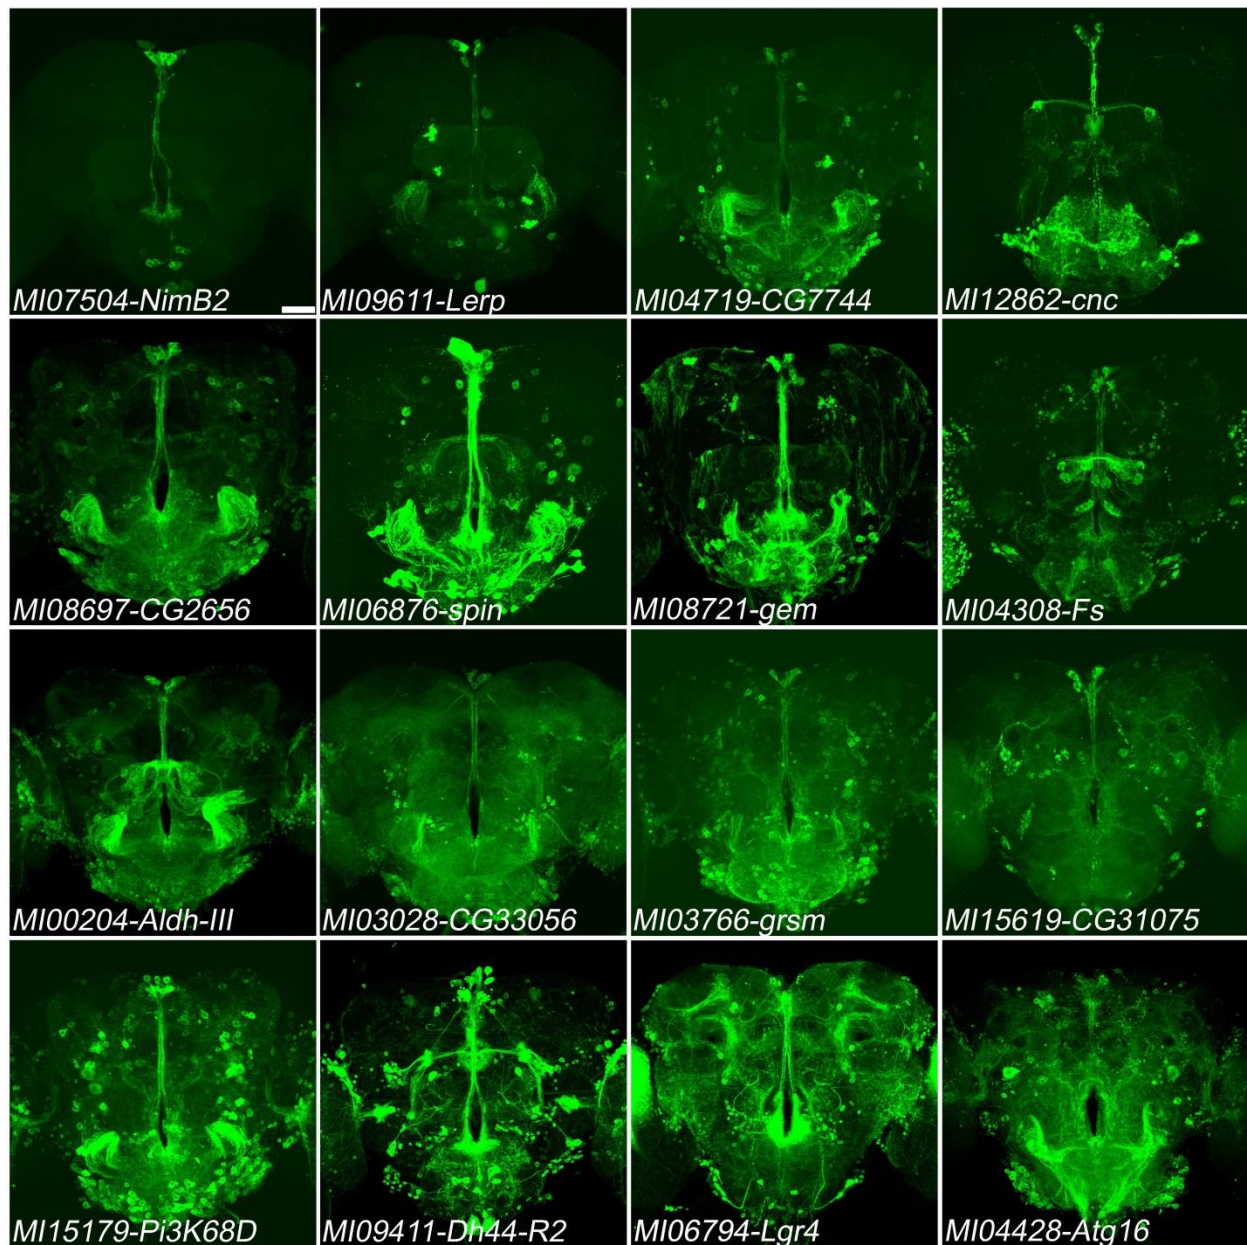

**Figure 5-figure supplement 3.** Genes expressed in PI neurons. 16 genes (*NimB2*, *Lerp*, *CG7744*, *cnc*, *CG2656*, *spin*, *gem*, *Fs*, *Aldh-III*, *CG33056*, *grsm*, *CG31075*, *Pi3K68D*, *Dh44-R2*, *Lgr4*, *Atg16*) exhibit relatively specific expression in PI neurons in adult brains. MiMIC *T2A-GAL4s* were crossed with *UAS-mCD8::GFP* (green). Scale bar: 50  $\mu$ m.
