# Supplementary material for: A gene-specific T2A-GAL4 library for Drosophila
Source: eLife journal article supplement (doi:10.7554/elife.35574), 2018-03-22
Supplement: supp [file elife-35574-supp-v1.zip › elife_poa_e35574_Supplementary_File_2.xlsx]

## Sheet: MiMIC T2A-GAL4
MI line	Gene	Chr.
MI03534	bdl	2
MI01525	CG30440	2
MI04596	coro	2
MI02854	Fili	2
MI11399	Ald	3
MI03370	CG11658	3
MI01769	CG13937	3
MI00213	CG17931	3
MI00781	CG31145	3
MI09533	CG8665	2
MI07697	Pdk	2
MI00887	Drip	2
MI00026	Pepck	2
MI08903	Amph	2
MI07680	Vmat	2
MI07065	pk	2
MI13293	CapaR	3
MI00178	Ac76E	3
MI00453	nAChRalpha1	3
MI14290	CG3999	3
MI12996	Papss	3
MI11128	srpk79D	3
MI03136	LPCAT	X
MI01374	sbr	X
MI06794	Lgr4	X
MI12214	if	X
MI01408	dpr15	3
MI06876	spin	2
MI02784	CLIP-190	2
MI05876	Pect	2
MI03660	Nhe2	2
MI15480	kn	2
MI01986	CG11030	2
MI05423	ClC-a	3
MI04698	Tusp	3
MI01987	RasGAP1	3
MI05871	Doa	3
MI02663	geko	3
MI02220	dally	3
MI00815	wmd	2
MI02451	PCB	2
MI04746	kcc	2
MI13487	CG11319	2
MI12296	emp	2
MI12531	retm	2
MI12643	fz	3
MI01907	Gprk2	3
MI05490	CCAP-R	3
MI08143	Sod1	3
MI01492	Pxn	3
MI05205	Eph	4
MI00290	tutl	2
MI00957	GlyP	2
MI02967	CG31690	2
MI00139	mbl	2
MI00946	Lon	3
MI02221	INPP5E	3
MI02509	Cep135	3
MI03286	btl	3
MI03375	Frl	3
MI04001	fbl	3
MI02396	CG32473	3
MI02955	Pur-alpha	4
MI04308	Fs	2
MI10996	Odc1	2
MI08653	Cbp53E	2
MI12855	CG46301	2
MI01665	Ino80	3
MI03252	Atg17	3
MI06413	Syp	3
MI09204	CG4467	3
MI04910	ftz-f1	3
MI05468	CG7510	3
MI06026	Nc73EF	3
MI07056	Atg1	3
MI04530	Fkbp14	2
MI03430	CG30456	2
MI05506	CG8170	2
MI02279	CG43729	2
MI08174	LManII	2
MI06374	CG42750	2
MI02732	CG9265	2
MI04428	Atg16	3
MI06742	CG43980	3
MI09512	PNPase	3
MI09243	gb	3
MI04971	ZnT41F	2
MI13171	Trim9	2
MI00766	CG14879	3
MI05426	CG6330	3
MI08675	arm	X
MI11551	Appl	X
MI14499	Gs2	X
MI05174	mtt	2
MI00783	stj	2
MI12160	CG4839	2
MI13104	CG8888	2
MI11597	CG4328	3
MI03614	CG42540	3
MI06446	prominin-like	3
MI12629	cic	3
MI03943	zip	2
MI03746	elB	2
MI04106	Hand	2
MI09411	Dh44-R2	2
MI02963	CAP	2
MI06051	mbc	3
MI02460	plx	3
MI05815	lute	3
MI08496	EDTP	2
MI00999	CG42260	2
MI02986	Btk29A	2
MI03631	GluRIIB	2
MI06811	Tret1-1	2
MI06811	Roc2	2
MI07513	Ance-4	2
MI11523	CG32944	3
MI10783	sls	3
MI04688	CG32091	3
MI11305	Ptx1	3
MI01455	CG2781	3
MI09043	Fmr1	3
MI03640	FER	3
MI01504	ds	2
MI01905	ASPP	2
MI01518	CG6084	3
MI10526	hh	3
MI04477	ens	3
MI04018	CG31728	2
MI11827	DIP-ε	2
MI06334	betaTub97EF	3
MI10278	Nrx-1	3
MI06739	Rbp	3
MI14131	LpR1	3
MI00340	gish	3
MI05117	Cip4	3
MI01789	CG42389	2
MI04940	CG34394	2
MI01548	MESK2	2
MI10363	cv-2	2
MI06674	CG11486	3
MI04068	CG7971	3
MI02333	CG42668	3
MI03637	hppy	2
MI08378	CG6191	2
MI06226	smal	2
MI05523	Shawl	2
MI12755	CG43795	2
MI04680	CG8213	2
MI07461	CG13833	3
MI13321	bmm	3
MI11058	NKCC	3
MI12417	Oamb	3
MI08146	RyR	2
MI11447	CG9663	2
MI03935	haf	2
MI11925	Src42A	2
MI10279	Np	2
MI03717	Wnt4	2
MI02467	sfl	3
MI01616	CG1309	3
MI00805	CG6966	3
MI13455	Adk1	3
MI03909	Lar	2
MI04713	Oatp58Dc	2
MI04877	Hr3	2
MI05514	CG4896	2
MI05296	Pkc53E	2
MI02518	zip	2
MI00615	sba	3
MI13416	Octbeta2R	3
MI02059	Nlg1	3
MI09597	Pkcdelta	X
MI02836	cac	X
MI07277	CG42672	2
MI03245	CG31689	2
MI03817	Lim3	2
MI04938	Myo28B1	2
MI13708	Cka	2
MI06389	stet	3
MI11374	S6k	3
MI05281	Mekk1	3
MI10524	CG12404	2
MI10586	CG34126	2
MI10102	conu	2
MI08264	sit	3
MI04238	CG8563	3
MI10227	CG18208	3
MI11688	CG14322	3
MI14761	gig	3
MI00347	Abl	3
MI08439	Cad99C	3
MI06498	l(1)G0289	X
MI11183	CG8086	2
MI07164	CG8303	2
MI02003	ptc	2
MI00063	SCAP	2
MI07174	CSN7	2
MI08895	CG33110	3
MI12300	CG6126	3
MI06870	CG42458	3
MI13113	Eaf	2
MI13106	CG5065	2
MI02879	CG7881	2
MI00023	CG30377	2
MI06872	CG34383	3
MI12856	IRSp53	3
MI08480	CG13893	3
MI12120	CG17819	3
MI13471	CG2187	3
MI02395	CG8907	3
MI10825	CG3164	2
MI05592	CG7997	2
MI13307	CG18641	2
MI03243	ssp6	3
MI08697	CG2656	3
MI06530	CG5521	3
MI14315	Nak	2
MI08707	dpr17	3
MI05719	dpr7	3
MI03001	sns	2
MI05134	grh	2
MI09180	Bsg	2
MI05004	ex	2
MI02634	CG10384	2
MI01487	kibra	3
MI00445	Nlg3	3
MI10456	lili	3
MI05739	CG14516	3
MI00602	dmGlut	2
MI00398	Trim9	2
MI08721	gem	2
MI12259	Got1	2
MI02469	CG32369	3
MI08580	MCU	3
MI05757	CG43427	3
MI00083	CG18304	2
MI08014	dom	2
MI01839	CG30456	2
MI12111	CG1407	2
MI01791	for	2
MI12017	fdl	2
MI10699	Pld	2
MI05026	CG31272	3
MI11124	twf	3
MI11098	CG8519	3
MI15302	CG3961	3
MI12277	par-1	2
MI05908	Pax	2
MI12387	Khc-73	2
MI02988	Zasp52	2
MI07420	Tsp42Ea	2
MI13162	Rho1	2
MI10953	dnt	2
MI02446	loco	3
MI05987	rn	3
MI14026	Fer1HCH	3
MI06822	mdy	2
MI03010	Mmp1	2
MI02868	Spn43Ab	2
MI02868	pk	2
MI08398	sick	2
MI06537	CG2082	3
MI12456	Gbs-70E	3
MI12862	cnc	3
MI12523	Spn	3
MI01968	scrib	3
MI09417	SNF4Agamma	3
MI15239	CG10702	2
MI03196	Ih	2
MI00231	kis	2
MI13018	salm	2
MI03597	mol	2
MI07033	rl	2
MI00990	wdb	3
MI02479	rols	3
MI04099	ome	3
MI02920	mtd	3
MI02840	CG7255	3
MI07688	wb	2
MI03442	Su(var)2-10	2
MI02751	Tsp	2
MI01911	Plc21C	2
MI02194	Rim2	2
MI13574	PyK	3
MI13586	Rab26	3
MI08614	Dgk	2
MI09739	Trpm	2
MI02713	CG10283	2
MI03485	Oct-TyrR	3
MI07645	TrpA1	3
MI04973	Tet	3
MI12218	Tet	3
MI12799	Cht7	3
MI05204	Samuel	2
MI08045	bin3	2
MI09425	nrv1	2
MI07759	RapGAP1	2
MI11485	beat-IIa	3
MI03766	grsm	3
MI13401	Tsp96F	3
MI01556	l(2)05287	2
MI07504	NimB2	2
MI08294	ine	2
MI04380	Tsp97E	3
MI02191	ltl	3
MI01161	Cad87A	3
MI00188	CG6321	3
MI05600	Pif1A	3
MI11715	Shroom	2
MI01466	nAChRalpha6	2
MI09702	spg	3
MI02371	GstZ2	3
MI08640	Lkr	3
MI04942	Usp10	3
MI00132	CG42673	3
MI02748	Oatp33Eb	2
MI11794	nvy	2
MI02286	sxc	2
MI13179	beat-IIIb	2
MI04600	GEFmeso	2
MI00476	GluRIB	3
MI09440	msn	3
MI00307	CG5404	3
MI10336	TkR99D	3
MI07360	Nha2	3
MI11466	CG40006	2
MI06587	Cyp49a1	2
MI08013	vari	2
MI13953	kek6	3
MI10038	ko	3
MI00009	CG15822	3
MI09514	Dscam2	3
MI03306	kuz	2
MI04800	lola	2
MI00391	CG31810	2
MI08585	Swip-1	2
MI11722	CenG1A	2
MI06550	SRPK	2
MI00125	eIF5B	3
MI09621	dsd	3
MI03498	Pop2	3
MI02943	Lasp	3
MI12785	igl	2
MI06235	kuz	2
MI14773	Mctp	2
MI15179	Pi3K68D	3
MI13563	trio	3
MI03581	RhoGAP92B	3
MI13043	Cyp4d8	3
MI13070	Kank	2
MI12945	CG17574	2
MI14153	twz	2
MI02507	l(2)k01209	2
MI12535	CG33964	2
MI01568	Gycbeta100B	3
MI05299	Cad96Ca	3
MI01009	Sytbeta	3
MI02045	Shroom	2
MI14545	CG9098	2
MI03128	LRP1	2
MI15524	CG6225	3
MI13272	CG7470	3
MI09858	CG31211	3
MI09246	CG14688	3
MI04189	Piezo	2
MI10513	Nipped-A	2
MI14316	otk	2
MI08038	Sobp	2
MI05744	Tab2	2
MI07137	unc80	3
MI14396	CG6293	3
MI12326	fry	3
MI10113	CG31368	3
MI06666	Synd	3
MI12515	PMCA	4
MI09505	nolo	2
MI10547	b	2
MI09585	Lpt	2
MI00819	Mal-A7	2
MI03816	CG15270	2
MI04522	Cat	3
MI15619	CG31075	3
MI02835	be	X
MI10323	flw	X
MI09281	Nmdar2	X
MI03598	CG31637	2
MI14478	bchs	2
MI10698	a	2
MI10382	CG11897	3
MI05019	eIF4G1	4
MI01316	Lapsyn	2
MI10140	ck	2
MI06931	PIG-G	2
MI04434	CG33012	2
MI01716	galla-1	2
MI09216	tws	3
MI09677	Rbfox1	3
MI01719	CG10973	3
MI12066	AcCoAS	3
MI09252	Usp30	X
MI07163	RhoGAP19D	X
MI04842	rst	X
MI09349	CG31663	2
MI04561	kon	2
MI13825	CG33090	2
MI12101	CG13784	2
MI03925	Sdc	2
MI06835	CG10365	3
MI11983	CG15019	3
MI13872	CG11898	3
MI06578	bt	4
MI12474	QC	3
MI10302	CG14995	3
MI03197	eIF4EHP	3
MI05807	Octbeta1R	3
MI06217	Octbeta3R	3
MI09433	inv	2
MI14128	rdo	2
MI11315	AstA-R2	3
MI06823	Pdk1	3
MI09163	CG17233	3
MI01069	Rab3-GEF	X
MI08565	Ca-alpha1T	X
MI02926	CG11138	X
MI01498	sdk	X
MI09386	Haspin	2
MI03635	mib2	2
MI12433	Oaf	2
MI07741	CG42748	2
MI08527	CG8405	2
MI05525	CG44247	2
MI05743	CG34347	3
MI04821	CG3344	3
MI09318	CG41099	3
MI01118	Nep2	3
MI08258	CG31475	3
MI11428	cysu	3
MI11872	ERp60	2
MI01901	nompB	2
MI03028	CG33056	3
MI08006	CG32444	3
MI05637	CG42342	3
MI12484	CG4562	3
MI04719	CG7744	2
MI02585	CG4629	2
MI04010	Tbh	X
MI04325	betaTub60D	2
MI14321	shot	2
MI03941	Mhc	2
MI02852	Egfr	2
MI11013	Egfr	2
MI13500	CG4752	2
MI05376	SIFaR	3
MI01234	CG4825	3
MI03360	CG33217	3
MI04180	CG6051	3
MI07404	RunxA	X
MI08152	bi	X
MI09722	RanBPM	2
MI10235	CG3714	2
MI12826	egl	2
MI11764	CG44252	2
MI03529	IntS3	2
MI03871	CG43102	3
MI01920	CG31559	3
MI04265	CG43143	3
MI13749	CG33203	3
MI01970	tweek	2
MI13859	nAChRalpha5	2
MI02923	hoe1	2
MI11211	Tsf3	2
MI09450	sqa	2
MI03325	pum	3
MI09611	Lerp	3
MI08564	CG7378	X
MI03851	Nost	X
MI12792	CG31809	2
MI01099	sprt	2
MI13472	Tep4	2
MI01146	mspo	2
MI07106	Pde6	3
MI12368	rad	X
MI07631	Not1	2
MI00283	CG4341	2
MI11559	CG44085	2
MI00447	Pih1D1	2
MI06861	PGRP-LC	3
MI03821	CG8270	3
MI02292	osa	3
MI02883	l(3)L1231	3
MI01627	PH4aMP	3
MI05960	sgl	3
MI03189	Ppn	3
MI05935	Hmu	3
MI01244	Npl4	3
MI03593	PH4aSG1	3
MI14102	Pldn	3
MI11063	SNF4Ag	3
MI11636	caix	3
MI11911	ebd2	3
MI11719	GILT1	3
MI10540	Eip63F-1	3
MI07818	acj6	X
MI07243	eas	X
MI02639	pen-2	2
MI10295	Ets98B	3
MI10343	CG8774	3
MI09861	Ubc4	3
MI00694	CG5500	3
MI04862	RhoGAP93B	3
MI08414	Fife	3
MI08587	Scsa	3
MI04707	cno	3
MI04139	fwd	3
MI07565	CG4301	X
MI01245	CG34449	X
MI10716	S6KL	X
MI00833	Galphao	2
MI14426	GluCla	3
MI01538	qin	3
MI09794	Adgf-D	3
MI02136	ry	3
MI04382	CG32486	3
MI13327	nau	3
MI10800	Appl	X
MI13728	CG17841	X
MI04955	CG43313	X
MI11741	CG12206	X
MI05027	Lrch	2
MI00302	Pli	3
MI11712	CG31259	3
MI00895	Iml1	3
MI07713	CG32795	X
MI10646	Cht6	X
MI11582	Drak	X
MI12989	Fas2	X
MI05334	Ser	3
MI11456	CG4576	3
MI07766	Nedd4	3
MI00204	Aldh-III	2
MI04585	Trpm	2
MI09551	CG6767	3
MI11277	Gfat1	3
MI10481	UGP	3
MI12441	goe	X
MI12471	CG32683	X
MI04620	prage	X
MI05770	l(1)G0196	X
MI09481	Ork1	X
MI09399	fne	X
MI07169	GstT4	X
MI04868	Dl	3
MI01804	Sowah	3
MI01790	Mta1-like	3
MI01539	CG46339	3
MI10577	Sema-5c	3
MI04399	bel	3
MI01231	Klp98A	3
MI03797	CG4662	3
MI08777	CG12541	X
MI09849	futsch	X
MI03650	slmb	3
MI04199	CG11970	3
MI01463	gukh	3
MI02323	Esp	3
MI13892	CG12531	X
MI10741	CG14431	X
MI05229	Kel	2
MI06776	CG9297	3
MI05768	CG3669	3
MI02141	hbs	2
MI07575	l(2)gl	2
MI03814	mam	2
MI06049	mam	2
MI01309	pip	3
MI08316	shi	X
MI07482	CG8177	3
MI01633	Esyt2	3
MI07695	btsz	3
MI05068	kdn	X
MI04804	CG1637	X
MI06853	sno	X
MI05602	Sema2a	2
MI10848	aPKC	2
MI02197	Syt1	2
MI06277	Syt7	4
MI04005	Gclc	X
MI06285	CG4456	3
MI10794	skap	3
MI02014	olf413	3
MI12981	RluA-2	2
MI07788	CG5482	2
MI11070	Ret	2
MI03108	stl	2
MI09857	AP-1gamma	X
MI00049	UbcE2M	3
MI07305	Pde9	X
MI13829	mip130	X
MI07365	qua	2
MI10226	CG42249	X
MI06071	stx	X
MI12545	nAChRalpha7	X
MI08078	Mnt	X
MI06463	slgA	X
MI06324	CG32732	X
MI02169	mGluR	4
MI05160	norpA	X
MI01329	CG6398	X
MI06039	CG32687	X
MI10366	Grip	X
MI13726	Atg8a	X
MI01863	RhoGAP18B	X
MI00773	MRP	2
MI09222	CG1578	X
MI02742	gce	X
MI11268	CG2316	4
MI02911	bun	2
MI00927	KrT95D	3

## Sheet: CRIMIC pM14
CR	Gene	Chr.	Donor DNA	FlyBase FBgn
CR00002	CG13887	3	pM14	FBgn0035165
CR00011	Eph	4	pM14	FBgn0025936
CR00012	DAT	2	pM14	FBgn0034136
CR00014	Liprin-alpha	2	pM14	FBgn0046704
CR00017	CycA	3	pM14	FBgn0000404
CR00018	Got2	2	pM14	FBgn0001125
CR00019	KrT95D	3	pM14	FBgn0020647
CR00021	Cdk1	2	pM14	FBgn0004106
CR00023	ATPCL	2	pM14	FBgn0020236
CR00024	LamC	2	pM14	FBgn0010397
CR00025	CG1640	X	pM14	FBgn0030478
CR00026	rictor	X	pM14	FBgn0031006
CR00027	l(1)G0156	X	pM14	FBgn0027291
CR00028	CG2316	4	pM14	FBgn0039890
CR00029	Psn	3	pM14	FBgn0284421
CR00030	Dhap-at	3	pM14	FBgn0040212
CR00031	CG7358	X	pM14	FBgn0030974
CR00033	Hsc70-5	2	pM14	FBgn0001220
CR00036	Itp-r83A	3	pM14	FBgn0010051
CR00037	Dsor1	X	pM14	FBgn0010269
CR00038	Atg5	X	pM14	FBgn0029943
CR00040	Acsl	2	pM14	FBgn0263120
CR00042	L2HGDH	2	pM14	FBgn0032729
CR00044	Uba1	2	pM14	FBgn0023143
CR00045	Dhc64C	3	pM14	FBgn0261797
CR00046	CG6903	X	pM14	FBgn0029737
CR00048	Nep3	X	pM14	FBgn0031081
CR00049	Sar1	3	pM14	FBgn0038947
CR00060	CG15111	2	pM14	FBgn0034419
CR00064	Pfk	2	pM14	FBgn0003071
CR00249	nonA	X	pM14	FBgn0004227
CR00250	wg	2	pM14	FBgn0284084
CR00253	lbk	2	pM14	FBgn0034083
CR00256	N	X	pM14	FBgn0004647
CR00258	CG5958	2	pM14	FBgn0031913
CR00260	CG8079	2	pM14	FBgn0034002
CR00261	whd	2	pM14	FBgn0261862
CR00265	parvin	X	pM14	FBgn0052528
CR00267	Acon	2	pM14	FBgn0010100
CR00268	shf	X	pM14	FBgn0003390
CR99902	14-3-3zeta	2	pM14	FBgn0004907
CR99903	Ald	3	pM14	FBgn0000064
CR99904	Atg8a	x	pM14	FBgn0052672
CR99905	CalpA	2	pM14	FBgn0012051
CR99906	Cdk4	2	pM14	FBgn0016131
CR99907	CG8888	2	pM14	FBgn0033679
CR99909	Got1	2	pM14	FBgn0001124
CR99910	jp	2	pM14	FBgn0032129
CR99911	Lamp1	2	pM14	FBgn0032949
CR99918	Vps35	2	pM14	FBgn0034708
CR99921	unc-119	X	pM14	FBgn0025549

## Sheet: CRIMIC pM36
CR	Gene	Chr.	Donor DNA	FlyBase FBgn
CR00050	gig	3	pM36	FBgn0005198
CR00071	pyd3	3	pM36	FBgn0037513
CR00083	Sec23	3	pM36	FBgn0262125
CR00090	CG3270	2	pM36	FBgn0033093
CR00108	Shmt	X	pM36	FBgn0029823
CR00111	Acer	2	pM36	FBgn0016122
CR00112	koi	2	pM36	FBgn0265003
CR00118	sws	X	pM36	FBgn0003656
CR00122	CG1358	2	pM36	FBgn0033196
CR00123	spas	3	pM36	FBgn0039141
CR00128	csw	X	pM36	FBgn0000382
CR00131	Adk2	2	pM36	FBgn0283494
CR00132	AkhR	2	pM36	FBgn0025595
CR00134	Etl1	2	pM36	FBgn0032157
CR00139	Nop17l	2	pM36	FBgn0033224
CR00143	Gmap	X	pM36	FBgn0027287
CR00158	CG30344	2	pM36	FBgn0050344
CR00173	MFS14	2	pM36	FBgn0010651
CR00183	Actn	X	pM36	FBgn0000667
CR00184	Aldh	2	pM36	FBgn0012036
CR00189	CG1315	3	pM36	FBgn0026565
CR00192	CG1673	X	pM36	FBgn0030482
CR00195	mEFTs	2	pM36	FBgn0032646
CR00196	bsf	2	pM36	FBgn0284256
CR00197	CG2852	2	pM36	FBgn0034753
CR00212	Top1	X	pM36	FBgn0004924
CR00251	GluRIA	3	pM36	FBgn0004619
CR00252	CG12766	3	pM36	FBgn0035476
CR00254	CG1544	3	pM36	FBgn0039827
CR00257	Syn1	3	pM36	FBgn0037130

## Sheet: CRIMIC pM37
CR	Gene	Chr.	Donor DNA	FlyBase FBgn
CR00275	CG5921	X	pM37-p0	FBgn0029835
CR00280	Surf4	3	pM37-p0	FBgn0019925
CR00283	CG11208	2	pM37-p0	FBgn0034488
CR00284	CG12766	3	pM37-p0	FBgn0035476
CR00286	ADPS	2	pM37-p0	FBgn0033983
CR00304	CG4887	2	pM37-p0	FBgn0031318
CR00305	Etl1	2	pM37-p0	FBgn0032157
CR00309	Drp1	2	pM37-p0	FBgn0026479
CR00311	Vinc	X	pM37-p0	FBgn0004397
CR00312	CG15923	3	pM37-p0	FBgn0038814
CR00313	AIF	2	pM37-p0	FBgn0031392
CR00315	HisRS	X	pM37-p0	FBgn0027087
CR00316	CG1673	X	pM37-p0	FBgn0030482
CR00320	CG8786	3	pM37-p0	FBgn0036897
CR00322	BRWD3	3	pM37-p0	FBgn0011785
CR00323	Marf	X	pM37-p0	FBgn0029870
CR00324	Hsf	2	pM37-p0	FBgn0001222
CR00325	nonA	X	pM37-p0	FBgn0004227
CR00327	BubR1	2	pM37-p0	FBgn0263855
CR00328	CG11208	2	pM37-p0	FBgn0034488
CR00329	gsb-n	2	pM37-p0	FBgn0001147
CR00330	boi	X	pM37-p0	FBgn0040388
CR00332	Gk1	3	pM37-p0	FBgn0025592
CR00333	Actn	X	pM37-p0	FBgn0000667
CR00334	csw	X	pM37-p0	FBgn0000382
CR00338	ktub	2	pM37-p0	FBgn0015721
CR00339	RnrS	2	pM37-p0	FBgn0011704
CR00341	Surf4	3	pM37-p0	FBgn0019925
CR00344	RpS5a	X	pM37-p0	FBgn0002590
CR00346	CG5938	3	pM37-p2	FBgn0046247
CR00347	Lgr3	3	pM37-p2	FBgn0039354
CR00348	Plod	3	pM37-p2	FBgn0036147
CR00350	AkhR	2	pM37-p2	FBgn0025595
CR00352	LamC	2	pM37-p2	FBgn0010397
CR00354	sax	2	pM37-p2	FBgn0003317
CR00355	Top1	X	pM37-p2	FBgn0004924
CR00358	L2HGDH	2	pM37-p2	FBgn0032729
CR00359	CG2852	2	pM37-p2	FBgn0034753
CR00361	CG3267	X	pM37-p2	FBgn0042083
CR00362	pic	3	pM37-p2	FBgn0260962
CR00363	Bx	X	pM37-p2	FBgn0265598
CR00364	CG4078	X	pM37-p2	FBgn0029798
CR00365	Wnt6	2	pM37-p2	FBgn0031902
CR00366	Gmap	X	pM37-p2	FBgn0027287
CR00368	stan	2	pM37-p2	FBgn0024836
CR00369	tio	2	pM37-p2	FBgn0028979
CR00370	sv	4	pM37-p2	FBgn0005561
CR00375	Hs3st-A	2	pM37-p2	FBgn0053147
CR00377	Rx	2	pM37-p2	FBgn0020617
CR00380	CG4911	3	pM37-p2	FBgn0035959
CR00381	CG12512	2	pM37-p2	FBgn0031703
CR00389	Cyp305a1	3	pM37-p1	FBgn0036910
CR00390	Clc-c	3	pM37-p1	FBgn0036566
CR00393	Vps13	2	pM37-p1	FBgn0033194
CR00395	unc-119	X	pM37-p1	FBgn0025549
CR00398	spas	3	pM37-p1	FBgn0039141
CR00401	Taz	2	pM37-p1	FBgn0026619
CR00402	Mfe2	X	pM37-p1	FBgn0030731
CR00404	Taldo	2	pM37-p1	FBgn0023477
CR00405	CG7766	X	pM37-p1	FBgn0030087
CR00406	muc	2	pM37-p1	FBgn0283658
CR00407	Tg	2	pM37-p1	FBgn0031975
CR00409	Thiolase	2	pM37-p1	FBgn0025352
CR00411	ND-49	4	pM37-p2	FBgn0039909
CR00412	Gyf	4	pM37-p1	FBgn0039936
CR00413	prom	2	pM37-p1	FBgn0259210
CR00415	Nep1	X	pM37-p1	FBgn0029843
CR00419	lz	X	pM37-p1	FBgn0002576
CR00420	Rtnl1	2	pM37-p1	FBgn0053113
CR00421	CG32751	X	pM37-p1	FBgn0052751
CR00424	kraken	2	pM37-p1	FBgn0020545
CR00428	CG1544	3	pM37-p1	FBgn0039827
CR00429	N	X	pM37-p1	FBgn0004647
CR00430	Acer	2	pM37-p1	FBgn0016122
CR00431	sicily	X	pM37-p1	FBgn0030352
CR00432	CG30020	2	pM37-p1	FBgn0050020
CR00434	koi	2	pM37-p1	FBgn0265003
CR00438	sws	X	pM37-p1	FBgn0003656
CR00439	CG1358	2	pM37-p1	FBgn0033196
CR00440	l(2)not	2	pM37-p1	FBgn0011297
CR00442	Gabat	3	pM37-p0	FBgn0036927
CR00446	Dsor1	X	pM37-p1	FBgn0010269
CR00448	DAT	2	pM37-p1	FBgn0034136
CR00449	bsf	2	pM37-p1	FBgn0284256
CR00450	CG7430	3	pM37-p0	FBgn0036762
CR00451	Sox21a	3	pM37-p2	FBgn0036411
CR00452	sr	3	pM37-p1	FBgn0003499
CR00454	Dhc93AB	3	pM37-p2	FBgn0013812
CR00456	AstCC	2	pM37-p0	FBgn0032337
CR00457	SRm160	3	pM37-p0	FBgn0036340
CR00458	CG14414	X	pM37-p0	FBgn0030571
CR00459	CG14442	X	pM37-p0	FBgn0029893
CR00460	CG10492	2	pM37-p0	FBgn0032748
CR00461	AhcyL1	3	pM37-p0	FBgn0035371
CR00462	fliI	X	pM37-p0	FBgn0000709
CR00463	CG8032	3	pM37-p0	FBgn0037606
CR00464	CG2543	X	pM37-p0	FBgn0030407
CR00465	Dap160	2	pM37-p0	FBgn0023388
CR00466	Eps-15	2	pM37-p0	FBgn0035060
CR00467	PI4KIIIalpha	X	pM37-p0	FBgn0267350
CR00468	mon2	2	pM37-p0	FBgn0031985
CR00470	Mul1	3	pM37-p0	FBgn0035483
CR00471	Atac3	3	pM37-p0	FBgn0052343
CR00473	CG2926	3	pM37-p0	FBgn0037344
CR00474	CG32174	3	pM37-p0	FBgn0052174
CR00476	Su(var)205	2	pM37-p1	FBgn0003607
CR00477	Kul	3	pM37-p1	FBgn0039688
CR00478	Su(var)3-3	3	pM37-p1	FBgn0260397
CR00481	CG17829	X	pM37-p1	FBgn0025635
CR00483	Raf	X	pM37-p1	FBgn0003079
CR00484	CG6543	2	pM37-p1	FBgn0033879
CR00485	dpr4	3	pM37-p1	FBgn0053512
CR00486	Zpr1	X	pM37-p1	FBgn0030096
CR00487	CG3328	2	pM37-p1	FBgn0034985
CR00489	robo1	2	pM37-p1	FBgn0005631
CR00490	CG3689	3	pM37-p1	FBgn0035987
CR00491	Topors	2	pM37-p1	FBgn0267351
CR00492	Utx	2	pM37-p1	FBgn0260749
CR00493	Cbl	3	pM37-p2	FBgn0020224
CR00494	l(2)gd1	2	pM37-p2	FBgn0261983
CR00495	ft	2	pM37-p0	FBgn0001075
CR00496	Hlc	X	pM37-p2	FBgn0001565
CR00497	Uba5	X	pM37-p2	FBgn0030305
CR00499	mRpS30	X	pM37-p2	FBgn0030692
CR00500	bur	2	pM37-p2	FBgn0000239
CR00501	CG43689	X	pM37-p2	FBgn0263772
CR00502	chp	3	pM37-p2	FBgn0267435
CR00503	Eaat2	2	pM37-p2	FBgn0026438
CR00504	CG8080	2	pM37-p2	FBgn0033373
CR00505	Rbf	X	pM37-p2	FBgn0015799
CR00506	betaCOP	X	pM37-p2	FBgn0008635
CR00508	Brms1	X	pM37-p0	FBgn0030434
CR00509	CG8239	X	pM37-p0	FBgn0030683
CR00510	MagR	X	pM37-p0	FBgn0026666
CR00511	ATPsyndelta	X	pM37-p0	FBgn0028342
CR00512	CG42749	X	pM37-p2	FBgn0261803
CR00515	dx	X	pM37-p2	FBgn0000524
CR00516	dpr14	X	pM37-p1	FBgn0029974
CR00517	MFS3	2	pM37-p1	FBgn0031307
CR00519	Sln	2	pM37-p0	FBgn0033657
CR00520	CG11294	X	pM37-p0	FBgn0030058
CR00521	Npc1a	2	pM37-p0	FBgn0024320
CR00523	Oct-TyrR	3	pM37-p0	FBgn0004514
CR00524	vanin-like	X	pM37-p1	FBgn0040069
CR00526	CG6012	2	pM37-p1	FBgn0032615
CR00527	Trxr-1	X	pM37-p1	FBgn0020653
CR00529	Cyp4e2	2	pM37-p1	FBgn0014469
CR00530	CG3078	X	pM37-p0	FBgn0023524
CR00531	Vha100-1	3	pM37-p0	FBgn0028671
CR00533	CG17119	3	pM37-p0	FBgn0039045
CR00536	CG31743	2	pM37-p0	FBgn0032618
CR00537	Lnk	3	pM37-p0	FBgn0028717
CR00538	Ser7	X	pM37-p0	FBgn0019929
CR00540	CG9170	X	pM37-p1	FBgn0030716
CR00541	Gba1b	3	pM37-p0	FBgn0051414
CR00545	Cyp4e1	2	pM37-p1	FBgn0015034
CR00546	Ent1	2	pM37-p0	FBgn0031250
CR00547	CG12118	X	pM37-p0	FBgn0030101
CR00548	CarT	2	pM37-p0	FBgn0032879
CR00551	DIP2	3	pM37-p1	FBgn0024806
CR00552	Vrp1	2	pM37-p0	FBgn0243516
CR00553	Syt14	3	pM37-p0	FBgn0261086
CR00554	Adhr	2	pM37-p0	FBgn0000056
CR00556	eIF4G2	3	pM37-p1	FBgn0260634
CR00557	Su(z)12	3	pM37-p1	FBgn0020887
CR00558	parvin	X	pM37-p1	FBgn0052528
CR00559	Sod2	2	pM37-p2	FBgn0010213
CR00561	UK114	2	pM37-p1	FBgn0086691
CR00562	Vha68-1	2	pM37-p1	FBgn0265262
CR00564	Kal1	3	pM37-p0	FBgn0039155
CR00565	ND-MWFE	2	pM37-p0	FBgn0085468
CR00567	Tsp47F	2	pM37-p0	FBgn0033629
CR00568	Gug	3	pM37-p0	FBgn0010825
CR00570	Gal	2	pM37-p0	FBgn0001089
CR00571	CG10353	X	pM37-p0	FBgn0030349
CR00572	Oaz	2	pM37-p0	FBgn0284250
CR00574	CG42255	3	pM37-p0	FBgn0259140
CR00575	amd	2	pM37-p0	FBgn0000075
CR00578	santa-maria	2	pM37-p0	FBgn0025697
CR00579	Cyp6v1	X	pM37-p0	FBgn0031126
CR00581	CG11406	2	pM37-p0	FBgn0034990
CR00582	AnxB10	X	pM37-p0	FBgn0000084
CR00583	CG1812	X	pM37-p0	FBgn0031119
CR00584	CG8668	2	pM37-p1	FBgn0031988
CR00585	Opa1	2	pM37-p1	FBgn0261276
CR00587	Hr38	2	pM37-p2	FBgn0014859
CR00588	Spn42De	2	pM37-p2	FBgn0033115
CR00590	CG13510	2	pM37-p2	FBgn0034758
CR00591	Oatp74D	3	pM37-p2	FBgn0036732
CR00592	bi	X	pM37-p2	FBgn0000179
CR00593	Hexo2	X	pM37-p2	FBgn0041629
CR00594	fbp	2	pM37-p0	FBgn0032820
CR00595	nudE	3	pM37-p0	FBgn0036059
CR00599	klhl10	2	pM37-p0	FBgn0040038
CR00600	CG34325	X	pM37-p0	FBgn0085354
CR00601	HDAC6	X	pM37-p0	FBgn0026428
CR00603	Mad	2	pM37-p1	FBgn0011648
CR00604	daw	2	pM37-p1	FBgn0031461
CR00605	CG11034	2	pM37-p1	FBgn0031741
CR00606	Poxn	2	pM37-p1	FBgn0003130
CR00607	CG30265	2	pM37-p1	FBgn0050265
CR00608	CG6472	2	pM37-p1	FBgn0034166
CR00611	CG10082	2	pM37-p1	FBgn0034644
CR00616	CG5379	3	pM37-p1	FBgn0038956
CR00621	JhI-21	2	pM37-p2	FBgn0028425
CR00622	ppk	2	pM37-p2	FBgn0020258
CR00623	Tep3	2	pM37-p2	FBgn0041181
CR00624	CCHa2-R	2	pM37-p2	FBgn0033058
CR00625	CG10505	2	pM37-p2	FBgn0034612
CR00631	pros	3	pM37-p2	FBgn0004595
CR00633	Mrp4	3	pM37-p2	FBgn0263316
CR00634	CG6574	3	pM37-p2	FBgn0037846
CR00636	CG9657	X	pM37-p2	FBgn0029950
CR00637	stg1	X	pM37-p2	FBgn0064123
CR00638	Moe	X	pM37-p2	FBgn0011661
CR00639	CG4829	X	pM37-p2	FBgn0030796
CR00641	IscU	3	pM37-p0	FBgn0037637
CR00642	sens-2	2	pM37-p2	FBgn0051632
CR00643	fzr	X	pM37-p2	FBgn0262699
CR00646	alpha-Est2	3	pM37-p2	FBgn0015570
CR00649	CG4945	2	pM37-p0	FBgn0034137
CR00651	botv	2	pM37-p0	FBgn0027535
CR00652	ValRS	2	pM37-p0	FBgn0027079
CR00653	CG11050	2	pM37-p0	FBgn0031836
CR00654	Mapmodulin	2	pM37-p0	FBgn0034282
CR00656	E2f2	2	pM37-p0	FBgn0024371
CR00657	CG6805	2	pM37-p0	FBgn0034179
CR00658	CCT8	2	pM37-p0	FBgn0284436
CR00660	alpha-Catr	2	pM37-p0	FBgn0029105
CR00662	GABA-B-R3	2	pM37-p0	FBgn0031275
CR00663	pgant2	2	pM37-p0	FBgn0031530
CR00664	mRpL24	2	pM37-p0	FBgn0031651
CR00666	CG8635	2	pM37-p0	FBgn0033317
CR00667	TM9SF2	2	pM37-p0	FBgn0032880
CR00668	Rchy1	2	pM37-p0	FBgn0031816
CR00669	CG1416	2	pM37-p0	FBgn0032961
CR00670	CG14591	2	pM37-p0	FBgn0033054
CR00671	prel	2	pM37-p0	FBgn0033413
CR00672	Syngr	2	pM37-p0	FBgn0033876
CR00673	CG10462	2	pM37-p0	FBgn0032815
CR00674	CG11807	2	pM37-p0	FBgn0033996
CR00675	ckn	2	pM37-p0	FBgn0033987
CR00676	CG16865	2	pM37-p0	FBgn0028919
CR00677	Drep4	2	pM37-p0	FBgn0028406
CR00678	Non1	2	pM37-p0	FBgn0028473
CR00680	gammaSnap1	2	pM37-p0	FBgn0028552
CR00681	sut1	2	pM37-p0	FBgn0028563
CR00683	ncm	2	pM37-p0	FBgn0086707
CR00684	boca	2	pM37-p0	FBgn0004132
CR00685	Gprk1	2	pM37-p0	FBgn0260798
CR00687	neb	2	pM37-p0	FBgn0004374
CR00688	Chd1	2	pM37-p0	FBgn0250786
CR00689	RpS27A	2	pM37-p0	FBgn0003942
CR00690	piwi	2	pM37-p0	FBgn0004872
CR00691	Sox14	2	pM37-p0	FBgn0005612
CR00693	Nox	2	pM37-p0	FBgn0085428
CR00694	CG34313	2	pM37-p0	FBgn0085342
CR00695	gammaTub37C	2	pM37-p0	FBgn0010097
CR00697	retn	2	pM37-p0	FBgn0004795
CR00698	Patronin	2	pM37-p0	FBgn0263197
CR00699	sau	2	pM37-p0	FBgn0267378
CR00700	Reps	2	pM37-p0	FBgn0032341
CR00701	cn	2	pM37-p0	FBgn0000337
CR00702	cta	2	pM37-p0	FBgn0000384
CR00704	CG44243	2	pM37-p0	FBgn0265178
CR00705	CG5022	2	pM37-p0	FBgn0032225
CR00706	CG4972	2	pM37-p0	FBgn0032217
CR00707	Cnot4	2	pM37-p0	FBgn0051716
CR00708	Sec24CD	2	pM37-p0	FBgn0262126
CR00710	Sfmbt	2	pM37-p0	FBgn0032475
CR00711	slim	2	pM37-p0	FBgn0261477
CR00712	esc	2	pM37-p0	FBgn0000588
CR00713	Fak	2	pM37-p0	FBgn0020440
CR00714	128up	2	pM37-p0	FBgn0010339
CR00717	CG10602	2	pM37-p0	FBgn0032721
CR00718	Fem-1	2	pM37-p0	FBgn0034542
CR00719	RpL18A	2	pM37-p0	FBgn0010409
CR00721	gcm2	2	pM37-p2	FBgn0019809
CR00722	ref(2)P	2	pM37-p1	FBgn0003231
CR00723	grnd	2	pM37-p1	FBgn0032682
CR00724	Atg7	2	pM37-p0	FBgn0034366
CR00725	jef	2	pM37-p0	FBgn0033958
CR00728	CG5142	2	pM37-p0	FBgn0032470
CR00729	crol	2	pM37-p0	FBgn0020309
CR00732	Rbcn-3A	X	pM37-p0	FBgn0023458
CR00733	betaggt-I	2	pM37-p0	FBgn0015000
CR00734	Golgin245	2	pM37-p0	FBgn0034854
CR00735	Phlpp	2	pM37-p0	FBgn0032749
CR00737	HLH54F	2	pM37-p0	FBgn0022740
CR00738	NC2alpha	2	pM37-p0	FBgn0034650
CR00739	CG5149	2	pM37-p0	FBgn0031904
CR00740	ssp3	2	pM37-p0	FBgn0032723
CR00741	Tret1-1	2	pM37-p0	FBgn0050035
CR00742	Ppt2	2	pM37-p0	FBgn0032358
CR00743	CG31715	2	pM37-p0	FBgn0051715
CR00744	Ing5	2	pM37-p0	FBgn0032516
CR00745	ave	2	pM37-p0	FBgn0050476
CR00746	sbb	2	pM37-p0	FBgn0285917
CR00747	Trp1	2	pM37-p0	FBgn0011584
CR00748	Trx-2	2	pM37-p0	FBgn0040070
CR00750	CG15161	2	pM37-p0	FBgn0032692
CR00752	CG14767	2	pM37-p0	FBgn0040777
CR00754	CG17059	2	pM37-p0	FBgn0040754
CR00756	CG7102	2	pM37-p1	FBgn0031961
CR00757	TTLL3A	2	pM37-p1	FBgn0031854
CR00760	Mtor	2	pM37-p1	FBgn0013756
CR00761	Arf51F	2	pM37-p1	FBgn0013750
CR00762	Wee1	2	pM37-p1	FBgn0011737
CR00763	RabX1	2	pM37-p1	FBgn0015372
CR00764	Psc	2	pM37-p1	FBgn0005624
CR00765	Rme-8	2	pM37-p1	FBgn0015477
CR00767	net	2	pM37-p1	FBgn0002931
CR00768	mle	2	pM37-p1	FBgn0002774
CR00769	inaD	2	pM37-p1	FBgn0001263
CR00770	H2.0	2	pM37-p1	FBgn0001170
CR00771	bsh	2	pM37-p1	FBgn0000529
CR00775	CG14022	2	pM37-p1	FBgn0031700
CR00778	rdgBbeta	2	pM37-p1	FBgn0027872
CR00780	CG8677	2	pM37-p1	FBgn0026577
CR00781	frj	2	pM37-p1	FBgn0031815
CR00782	Flo1	2	pM37-p1	FBgn0024754
CR00784	Sin3A	2	pM37-p1	FBgn0022764
CR00785	eRF3	2	pM37-p1	FBgn0020443
CR00787	unpg	2	pM37-p1	FBgn0015561
CR00788	CG6495	2	pM37-p1	FBgn0027550
CR00789	CG34194	2	pM37-p1	FBgn0085223
CR00790	stmA	2	pM37-p1	FBgn0086784
CR00791	Rcd1	2	pM37-p1	FBgn0033897
CR00792	CG31635	2	pM37-p1	FBgn0051635
CR00793	Nup54	2	pM37-p1	FBgn0033737
CR00794	CG8858	2	pM37-p1	FBgn0033698
CR00795	HSPC300	2	pM37-p1	FBgn0061198
CR00796	CG8401	2	pM37-p1	FBgn0034069
CR00797	SCAR	2	pM37-p1	FBgn0041781
CR00798	Magi	2	pM37-p1	FBgn0034590
CR00799	Epac	2	pM37-p1	FBgn0085421
CR00800	CG17765	2	pM37-p1	FBgn0033529
CR00801	AsnRS	2	pM37-p1	FBgn0086443
CR00802	jing	2	pM37-p1	FBgn0086655
CR00803	CG8321	2	pM37-p1	FBgn0033677
CR00806	levy	2	pM37-p1	FBgn0034877
CR00808	CG9945	2	pM37-p1	FBgn0034527
CR00812	yki	2	pM37-p1	FBgn0034970
CR00813	Rgk2	2	pM37-p1	FBgn0085419
CR00815	CG9646	2	pM37-p1	FBgn0034184
CR00816	CG8399	2	pM37-p0	FBgn0034067
CR00818	CG13096	2	pM37-p0	FBgn0032050
CR00819	rho-7	2	pM37-p1	FBgn0033672
CR00820	CG12325	2	pM37-p1	FBgn0033557
CR00821	Socs36E	2	pM37-p1	FBgn0041184
CR00823	Asph	2	pM37-p1	FBgn0034075
CR00825	CG5174	2	pM37-p1	FBgn0034345
CR00826	Kua	2	pM37-p1	FBgn0032850
CR00827	mRpL13	2	pM37-p1	FBgn0032720
CR00828	CG10413	2	pM37-p1	FBgn0032689
CR00829	CG34174	2	pM37-p1	FBgn0085203
CR00830	und	2	pM37-p1	FBgn0283478
CR00832	CG10338	2	pM37-p1	FBgn0032700
CR00833	Hakai	2	pM37-p1	FBgn0032812
CR00834	CG10188	2	pM37-p1	FBgn0032796
CR00835	CG6686	2	pM37-p1	FBgn0032388
CR00836	Thor	2	pM37-p1	FBgn0261560
CR00837	Tif-IA	2	pM37-p1	FBgn0032988
CR00839	clos	2	pM37-p1	FBgn0261016
CR00841	PAN2	2	pM37-p1	FBgn0033352
CR00842	ena	2	pM37-p2	FBgn0000578
CR00844	cl	2	pM37-p2	FBgn0000318
CR00845	Sema1b	2	pM37-p2	FBgn0016059
CR00846	cni	2	pM37-p2	FBgn0000339
CR00847	dare	2	pM37-p2	FBgn0015582
CR00848	lig	2	pM37-p2	FBgn0020279
CR00849	Dyrk2	2	pM37-p2	FBgn0016930
CR00850	spen	2	pM37-p2	FBgn0016977
CR00851	SamDC	2	pM37-p2	FBgn0019932
CR00852	CG5554	2	pM37-p2	FBgn0034914
CR00853	CG31908	2	pM37-p2	FBgn0051908
CR00854	CG31751	2	pM37-p2	FBgn0086909
CR00855	RpL30	2	pM37-p2	FBgn0086710
CR00856	Prp19	2	pM37-p2	FBgn0261119
CR00858	shg	2	pM37-p2	FBgn0003391
CR00859	E(Pc)	2	pM37-p2	FBgn0000581
CR00860	antr	2	pM37-p2	FBgn0050488
CR00864	CG4038	2	pM37-p2	FBgn0011824
CR00865	milt	2	pM37-p2	FBgn0262872
CR00866	Acn	2	pM37-p2	FBgn0263198
CR00867	for	2	pM37-p2	FBgn0000721
CR00873	CG9304	2	pM37-p2	FBgn0034674
CR00878	Fpps	2	pM37-p2	FBgn0025373

## Sheet: Fly stock information
P[acman] genomic duplications utilized
Affected gene	BDSC	RRID	Genotype
sbr	32315	BDSC_32315	w[1118]; Dp(1;3)DC508, PBac{y[+mDint2] w[+mC]=DC508}VK00033/TM6C, Sb[1]
cac	30272	BDSC_30272	w[1118]; Dp(1;3)DC131, PBac{y[+mDint2] w[+mC]=DC131}VK00033
acj6	32320	BDSC_32320	w[1118]; Dp(1;3)DC192, PBac{y[+mDint2] w[+mC]=DC192}VK00033/TM6C, Sb[1]
arm	30230	BDSC_30230	w[1118]; Dp(1;3)DC034, PBac{y[+mDint2] w[+mC]=DC034}VK00033
flw	30345	BDSC_30345	w[1118]; Dp(1;3)DC224, PBac{y[+mDint2] w[+mC]=DC224}VK00033
if	30428	BDSC_30428	w[1118]; Dp(1;3)DC319, PBac{y[+mDint2] w[+mC]=DC319}VK00033
Nc73EF	30363	BDSC_30363	w[1118]; Dp(1;3)DC245, PBac{y[+mDint2] w[+mC]=DC245}VK00033
Marf	30293	BDSC_30293	w[1118]; Dp(1;3)DC155, PBac{y[+mDint2] w[+mC]=DC155}VK00033
Dsor1	30328	BDSC_30328	w[1118]; Dp(1;3)DC205, PBac{y[+mDint2] w[+mC]=DC205}VK00033
Raf	30798	BDSC_30798	w[1118]; Dp(1;3)DC404, PBac{y[+mDint2] w[+mC]=DC404}VK00033
Rbf	30222	BDSC_30222	w[1118]; Dp(1;3)DC012, PBac{y[+mDint2] w[+mC]=DC012}VK00033
Moe	32274	BDSC_32274	w[1118]; Dp(1;3)DC199, PBac{y[+mDint2] w[+mC]=DC199}VK00033
Kdn	32267	BDSC_32267	w[1118]; Dp(1;3)DC154, PBac{y[+mDint2] w[+mC]=DC154}VK00033
Flies used for Complementation test
Affected gene	BDSC	RRID	Genotype
for	24122	BDSC_24122	Df(2L)ED243/SM6a
Tsp	7801	BDSC_7801	Df(2L)Exel7027/CyO
Pdk1	7562	BDSC_7562	Df(3L)Exel6083/TM6B, Tb[1]
SNF4Ag	9487	BDSC_9487	Df(3R)ED10845/TM6C, cu[1] Sb[1]
salm	24905	BDSC_24905	Df(2L)BSC242/CyO
PyK	27377	BDSC_27377	Df(3R)BSC805/TM6C, Sb1 cu1
kis	9177	BDSC_9177	Df(2L)ED21/SM6a
gish	7984	BDSC_7984	Df(3R)Exel7329/TM6B, Tb[1]
MESK2	7556	BDSC_7556	Df(2R)Exel6076/CyO
CAP	23666	BDSC_23666	Df(2R)BSC281/CyO
Btk29A	9627	BDSC_9627	Df(2L)BSC200/CyO
4EHP	7676	BDSC_7676	Df(3R)Exel6197/TM6B, Tb[1]
mol	23154	BDSC_23154	Df(2L)BSC254/CyO
Sdc	7556	BDSC_7556	Df(2R)Exel6076/CyO
fbl	26519	BDSC_26519	Df(3L)BSC667/TM6C, Sb[1] cu[1]
lola	8909	BDSC_8909	Df(2R)ED2076/SM6a
Cip4	7922	BDSC_7922	Df(3L)Exel8098/TM6B, Tb[1]
vari	7852	BDSC_7852	Df(2L)Exel7079/CyO
Trpm	24370	BDSC_24370	Df(2R)BSC346/CyO
trio	8051	BDSC_8051	Df(3L)ED202/TM6C, cu[1] Sb[1]
mbl	7548	BDSC_7548	Df(2R)Exel6066/CyO
tutl	23680	BDSC_23680	Df(2L)BSC295/CyO
Abl	25123	BDSC_25123	Df(3L)BSC561/TM6C, Sb[1]
stj	7873	BDSC_7873	Df(2R)Exel7128/CyO
kibra	28025	BDSC_29025	Df(3R)BSC841/TM6C, Sb[1] cu[1]
ds	7774	BDSC_7774	Df(2L)Exel8003/CyO
RasGAP1	24418	BDSC_24418	Df(3L)BSC394/TM6C, Sb[1] cu[1]
Brf	25388	BDSC_25388	Df(3R)BSC564/TM6C, Sb[1]
ltl	1420	BDSC_1420	Df(3L)pbl-X1/TM6C, Sb[1]
dally	9070	BDSC_9070	Df(3L)ED4413/TM6C, cu[1] Sb[1]
Mhc	24114	BDSC_24114	Df(2L)ED1161/SM6a
sxc	25705	BDSC_25705	Df(2R)BSC630/CyO
osa	27362	BDSC_27362	Df(3R)BSC790/TM6C, Sb[1] cu[1]
sfl	8063	BDSC_8063	Df(3L)ED211/TM6C, cu[1] Sb[1]
rols	8069	BDSC_8069	Df(3L)ED4475/TM6C, cu[1] Sb[1]
l(2)k01209	9596	BDSC_9596	Df(2R)BSC161/CyO
zip	25441	BDSC_25441	Df(2R)BSC608/SM6a
btl	8073	BDSC_8073	Df(3L)ED4543/TM6C, cu[1] Sb[1]
kuz	9506	BDSC_9506	Df(2L)BSC147/CyO
Nhe2	23685	BDSC_23685	Df(2L)BSC302/CyO
elB	7518	BDSC_7518	Df(2L)Exel6035/CyO
Lar	7526	BDSC_7526	Df(2L)Exel6044/CyO
zip	25441	BDSC_25441	Df(2R)BSC608/SM6a
Cat	27348	BDSC_27348	Df(3L)BSC776/TM6C, Sb[1] cu[1]
Fkbp14	7556	BDSC_7556	Df(2R)Exel6076/CyO
kon	9508	BDSC_9508	Df(2L)BSC149/CyO
coro	7533	BDSC_7533	Df(2R)Exel6051/CyO
kcc	25434	BDSC_25434	Df(2R)BSC601/SM6a
Hr3	24374	BDSC_24374	Df(2R)BSC350/CyO
ftz-f1	27918	BDSC_27918	Df(3L)BSC844/TM6C, Sb[1] cu[1]
ex	8673	BDSC_8673	Df(2L)BSC107/SM6a
grh	6778	BDSC_6778	Df(2R)02B10W-08/SM6a
Samuel	9716	BDSC_9716	Df(2L)BSC241/CyO
Cad96Ca	7994	BDSC_7994	Df(3R)Exel9056/TM6B, Tb[1]
Doa	27378	BDSC_27378	Df(3R)BSC806/TM6C, Sb[1] cu[1]
Nc73EF	64121	BDSC_64121	Df(3L)ED4685/TM6C, cu[1] Sb[1]
Rbp	7653	BDSC_7653	Df(3R)Exel6174/TM6B, Tb[1]
spin	3520	BDSC_3520	Df(2R)Jp8, w[+]/CyO
Atg1	25688	BDSC_25688	Df(3L)BSC613/TM6C, cu[1] Sb[1]
wb	25164	BDSC_25164	Df(2L)ED8186/SM6a
bin3	24339	BDSC_24339	Df(2R)BSC313/CyO
Sod1	27578	BDSC_27578	Df(3L)BSC817/TM6C, Sb[1] cu[1]
RyR	23165	BDSC_23165	Df(2R)BSC269/CyO
Bsg	24130	BDSC_24130	Df(2L)ED548/SM6a
tws	7732	BDSC_7732	Df(3R)Exel6265/TM6B, Tb[1]
Lpt	25443	BDSC_25443	Df(2R)BSC610/SM6a
RanBPM	9277	BDSC_9277	Df(2R)ED2098/SM6a
ck	23683	BDSC_23683	Df(2L)BSC299/CyO
Np	23166	BDSC_23166	Df(2R)BSC270/CyO
Nipped-A	25705	BDSC_25705	Df(2R)BSC630/CyO
hh	25694	BDSC_2694	Df(3R)BSC619/TM6C, cu[1] Sb[1]
b	7826	BDSC_7826	Df(2L)Exel7059/CyO
S6k	24942	BDSC_24942	Df(3L)BSC438/TM6C, Sb[1] cu[1]
Src42A	32253	BDSC_32253	Df(2R)BSC889/SM6a
fry	26521	BDSC_26521	Df(3L)BSC669/TM6C, Sb[1] cu[1]
cic	9479	BDSC_9479	Df(3R)ED6027/TM6C, cu[1] Sb[1]
Rho1	8915	BDSC_8915	Df(2R)ED2457/SM6a
bmm	8074	BDSC_8074	Df(3L)ED217/TM6C, cu[1] Sb[1]
Cka	11451	BDSC_11451	P{ry[+t7.2]=PZ}Cka[05836] cn[1]/CyO
shot	24407	BDSC_24407	Df(2R)BSC383/CyO
gig	24950	BDSC_24950	Df(3L)BSC446/TM6C, Sb[1] cu[1]
kn	24933	BDSC_24933	Df(2R)BSC429/CyO
Drp1	90	BDSC_90	Df(2L)C144/In(2LR)Gla
BRWD3	25728	BDSC_25728	Df(3R)BSC638/TM6C, cu[1] Sb[1]
Surf4	9152	BDSC_9152	Df(3R)ED5705/TM3, Ser[1]
LamC	24381	BDSC_24381	Df(2R)BSC357/CyO
sax	23164	BDSC_23164	Df(2R)BSC265/CyO
pic	7646	BDSC_7646	Df(3R)Exel6167/TM6B, Tb[1]
bsf	9508	BDSC_9508	Df(2L)BSC149/CyO
sr	25014	BDSC_25014	Df(3R)BSC510/TM6C, Sb[1] cu[1]
Dap160	23685	BDSC_23685	Df(2L)BSC302/CyO
Eps-15	25439	BDSC_25439	Df(2R)BSC606/SM6a
Utx	27909	BDSC_27909	Df(2L)BSC827/SM6a
l(2)gd1	7510	BDSC_7510	Df(2L)Exel6027/CyO
Npc1a	9503	BDSC_9503	Df(2L)BSC143/CyO
Sod2	7887	BDSC_7887	Df(2R)Exel7145/CyO
ND-MWFE	7871	BDSC_7871	Df(2R)Exel8057/CyO
amd	7847	BDSC_7847	Df(2L)Exel8040/CyO
Hr38	9175	BDSC_9175	Df(2L)ED1317/SM6a
Wee1	8847	BDSC_8847	Df(2L)BSC108/CyO
UAS-cDNA-containing strains used for rescue tests
Affected gene	BDSC	RRID	Genotype
sbr	24462	BDSC_24462	w[*]; P{w[+mC]=UAS-sbr.V}2.8
cac	8581	BDSC_8581	w[*]; P{w[+mC]=UAS-cac1-EGFP}786C
flw	23703	BDSC_23703	w[*]; P{w[+mC]=UAS-flw.HA}2
CAP	65387	BDSC_65387	w[*]; P{w[+mC]=UAS-CAP.C}5/TM3, Sb[1]
kuz	5816	BDSC_5816	w[*]; P{w[+mC]=UAS-kuz.F}DF1
spin	39668	BDSC_39668	w[*]; P{w[+mC]=UAS-spin.myc-EGFP}B
Cka	53757	BDSC_53757	w[*]; P{w[+mC]=UASp-Cka.EGFP.C}3/TM3, Sb[1]
dally	5397	BDSC_5397	w[*] P{w[+mC]=UAS-dally.J}SJ1
Atg1	51654	BDSC_51654	y[1] w[*]; P{w[+mC]=UAS-Atg1.S}6A
Sod1	33605	BDSC_33605	w[1118]; P{w[+mC]=UAS-Sod1}12.1
Marf	67157	BDSC_67157	y[1] w[*]; P{w[+mC]=UAS-Marf.HA.S}3/T(2;3)TSTL, CyO: TM6B, Tb[1]
Raf	2033	BDSC_2033	w[*]; P{w[+mC]=UAS-Raf.gof}F179
Moe	52236	BDSC_52236	w[*]; P{w[+mC]=UAS-Moe.myc}4
Dap160	42695	BDSC_42695	y[1] w[*]; L[2]/CyO; P{w[+mC]=UAS-Dap160.K}4.1
Eps-15	39671	BDSC_39671	w[*]; l(2)*[*]/CyO; P{w[+mC]=UAS-Eps-15.K}3/TM6B, Tb[+]
l(2)gd1	25089	BDSC_25089	w[*]; P{w[+mC]=UAS-lgd.HA}3
Npc1a	41763	BDSC_41763	w[*]; P{w[+mC]=UAS-NPC1.YFP}3
Sod2	27645	BDSC_27645	P{w[+mC]=UAS-Sod2.Z}1B, y[1] w[*]; Sod2[Delta02]/CyO
Wee1	65389	BDSC_65389	P{w[+mC]=UASp-Wee1.P}1, w[*]
sr	36533	BDSC_36533	w[*]; P{w[+mC]=UAS-sr.b.V}59
Affected gene	FlyORF ID	RRID	Genotype
acj6	F001907		M{UAS-acj6.ORF.3xHA.GW}ZH-86Fb
arm	F001215		M{UAS-arm.ORF.3xHA}ZH-86Fb
stj	F001252		M{UAS-stj.ORF.3xHA}ZH-86Fb
mol	F001029		M{UAS-mol.ORF.3xHA}ZH-86Fb
lola	F001847		M{UAS-lola.ORF.3xHA.GW}ZH-86Fb
Bsg	F000945		M{UAS-Bsg.ORF.3xHA}ZH-86Fb
Rho1	F001250		M{UAS-Rho1.ORF.3xHA}ZH-86Fb
kn	F000620		M{UAS-kn.ORF.3xHA.GW}ZH-86Fb
ftz-f1	F001882		M{UAS-ftz-f1.ORF.3xHA.GW}ZH-86Fb
Dsor1	F001169		M{UAS-Dsor1.ORF.3xHA}ZH-86Fb
Rbf	F000558		M{UAS-Rbf.ORF.3xHA.GW}ZH-86Fb
sax	F001756		M{UAS-sax.ORF.3xHA}ZH-86Fb
Hr38	F001845		M{UAS-Hr38.ORF.3xHA.GW}ZH-86Fb
Other Fly Stocks
Line	BDSC	RRID	Genotype
repo-GAL4	7415	BDSC_7415	w[1118]; P{w[+m*]=GAL4}repo/TM3, Sb[1]
btl-GAL4	8807	BDSC_8807	w[*]; P{w[+mC]=GAL4-btl.S}2, P{w[+mC]=UASp-Act5C.T:GFP}2/CyO, P{w[+m*]=lacZ-un3}276
Ilp2-GAL4	37516	BDSC_38516	w*; P{Ilp2-GAL4.R}2
UAS-mCD8::GFP	32182	BDSC_32182	w[*]; P{y[+t7.7] w[+mC]=10XUAS-IVS-mCD8::GFP}attP2
UAS-mCD8::RFP	32218	BDSC_32218	w*; P{10XUAS-IVS-mCD8::RFP}attP2
UAS-2xEGFP	60292	BDSC_60292	y[1] w[*]; P{w[+mC]=UAS-2xEGFP}AH2; Dr[1]/TM3, Sb[1]
UAS-2xEGFP	60293	BDSC_60293	y[1] w[*]; wg[Sp-1]/CyO; P{w[+mC]=UAS-2xEGFP}AH3
hs-cre,vas-phiC31	60299	BDSC_60299	y[1] M{vas-int.Dm}ZH-2A w[*], P{y[+mDint2]=Crey}1b
Trojan GAL4 triplet	60310	BDSC_60310	y1 w*; P{lox(Trojan-GAL4)x3}10; Dr1/TM3, Sb1 Ser1
Trojan GAL4 triplet	60311	BDSC_60311	y1 w*; wgSp-1/CyO; P{lox(Trojan-GAL4)x3}11
UAS-FLP	4540	BDSC_4540	w[*]; P{w[+mC]=UAS-FLP.D}JD2
Line	DGGR	RRID	Genotype
NP2222-GAL4	112830		w*; P{w+mW.hs=GawB}Akap200NP2222/CyO
NP6250-GAL4	113878		y[*] w[*]; P{w[+mW.hs]=GawB}NP6250 / CyO, P{w[-]=UAS-lacZ.UW14}UW14
NP1243-GAL4	103953		y[*] w[*]; P{w[+mW.hs]=GawB}wun[NP1243]/CyO, P{w[-]=UAS-lacZ.UW14}UW14

## Sheet: complementation results
MiMIC T2A-GAL4	Gene	Class	Chr.	DF genotype
MI01791	for	Bronze	2	Df(2L)ED243/SM6a
MI02751	Tsp	Bronze	2	Df(2L)Exel7027/CyO
MI06823	Pdk1	Bronze	3	Df(3L)Exel6083/TM6B, Tb[1]
MI11063	SNF4Agamma	Bronze	3	Df(3R)ED10845/TM6C, cu[1] Sb[1]
MI13018	salm	Bronze	2	Df(2L)BSC242/CyO
MI13574	PyK	Bronze	3	Df(3R)BSC805/TM6C, Sb1 cu1
MI00231	kis	Silver	2	Df(2L)ED21/SM6a
MI00340	gish	Silver	3	Df(3R)Exel7329/TM6B, Tb[1]
MI01548	MESK2	Silver	2	Df(2R)Exel6076/CyO
MI02963	CAP	Silver	2	Df(2R)BSC281/CyO
MI02986	Btk29A	Silver	2	Df(2L)BSC200/CyO
MI03197	4EHP	Silver	3	Df(3R)Exel6197/TM6B, Tb[1]
MI03597	mol	Silver	2	Df(2L)BSC254/CyO
MI03925	Sdc	Silver	2	Df(2R)Exel6076/CyO
MI04001	fbl	Silver	3	Df(3L)BSC667/TM6C, Sb[1] cu[1]
MI04800	lola	Silver	2	Df(2R)ED2076/SM6a
MI05117	Cip4	Silver	3	Df(3L)Exel8098/TM6B, Tb[1]
MI08013	vari	Silver	2	Df(2L)Exel7079/CyO
MI09739	Trpm	Silver	2	Df(2R)BSC346/CyO
MI13563	trio	Silver	3	Df(3L)ED202/TM6C, cu[1] Sb[1]
MI00139	mbl	Gold	2	Df(2R)Exel6066/CyO
MI00290	tutl	Gold	2	Df(2L)BSC295/CyO
MI00347	Abl	Gold	3	Df(3L)BSC561/TM6C, Sb[1]
MI00783	stj	Gold	2	Df(2R)Exel7128/CyO
MI01487	kibra	Gold	3	Df(3R)BSC841/TM6C, Sb[1] cu[1]
MI01504	ds	Gold	2	Df(2L)Exel8003/CyO
MI01987	RasGAP1	Gold	3	Df(3L)BSC394/TM6C, Sb[1] cu[1]
MI02107	Brf	Gold	3	Df(3R)BSC564/TM6C, Sb[1]
MI02191	ltl	Gold	3	Df(3L)pbl-X1/TM6C, Sb[1]
MI02220	dally	Gold	3	Df(3L)ED4413/TM6C, cu[1] Sb[1]
MI03941	Mhc	Gold	2	Df(2L)ED1161/SM6a
MI02286	sxc	Gold	2	Df(2R)BSC630/CyO
MI02292	osa	Gold	3	Df(3R)BSC790/TM6C, Sb[1] cu[1]
MI02467	sfl	Gold	3	Df(3L)ED211/TM6C, cu[1] Sb[1]
MI02479	rols	Gold	3	Df(3L)ED4475/TM6C, cu[1] Sb[1]
MI02507	l(2)k01209	Gold	2	Df(2R)BSC161/CyO
MI02518	zip	Gold	2	Df(2R)BSC608/SM6a
MI03286	btl	Gold	3	Df(3L)ED4543/TM6C, cu[1] Sb[1]
MI03306	kuz	Gold	2	Df(2L)BSC147/CyO
MI03660	Nhe2	Gold	2	Df(2L)BSC302/CyO
MI03746	elB	Gold	2	Df(2L)Exel6035/CyO
MI03909	Lar	Gold	2	Df(2L)Exel6044/CyO
MI03943	zip	Gold	2	Df(2R)BSC608/SM6a
MI04522	Cat	Gold	3	Df(3L)BSC776/TM6C, Sb[1] cu[1]
MI04530	Fkbp14	Gold	2	Df(2R)Exel6076/CyO
MI04561	kon	Gold	2	Df(2L)BSC149/CyO
MI04596	coro	Gold	2	Df(2R)Exel6051/CyO
MI04746	kcc	Gold	2	Df(2R)BSC601/SM6a
MI04877	Hr3	Gold	2	Df(2R)BSC350/CyO
MI04910	ftz-f1	Gold	3	Df(3L)BSC844/TM6C, Sb[1] cu[1]
MI05004	ex	Gold	2	Df(2L)BSC107/SM6a
MI05134	grh	Gold	2	Df(2R)02B10W-08/SM6a
MI05204	Samuel	Gold	2	Df(2L)BSC241/CyO
MI05299	Cad96Ca	Gold	3	Df(3R)Exel9056/TM6B, Tb[1]
MI05871	Doa	Gold	3	Df(3R)BSC806/TM6C, Sb[1] cu[1]
MI06026	Nc73EF	Gold	3	Df(3L)ED4685/TM6C, cu[1] Sb[1]
MI06739	Rbp	Gold	3	Df(3R)Exel6174/TM6B, Tb[1]
MI06876	spin	Gold	2	Df(2R)Jp8, w[+]/CyO
MI07056	Atg1	Gold	3	Df(3L)BSC613/TM6C, cu[1] Sb[1]
MI07688	wb	Gold	2	Df(2L)ED8186/SM6a
MI08045	bin3	Gold	2	Df(2R)BSC313/CyO
MI08143	Sod1	Gold	3	Df(3L)BSC817/TM6C, Sb[1] cu[1]
MI08146	RyR	Gold	2	Df(2R)BSC269/CyO
MI09180	Bsg	Gold	2	Df(2L)ED548/SM6a
MI09216	tws	Gold	3	Df(3R)Exel6265/TM6B, Tb[1]
MI09585	Lpt	Gold	2	Df(2R)BSC610/SM6a
MI09722	RanBPM	Gold	2	Df(2R)ED2098/SM6a
MI10140	ck	Gold	2	Df(2L)BSC299/CyO
MI10279	Np	Gold	2	Df(2R)BSC270/CyO
MI10513	Nipped-A	Gold	2	Df(2R)BSC630/CyO
MI10526	hh	Gold	3	Df(3R)BSC619/TM6C, cu[1] Sb[1]
MI10547	b	Gold	2	Df(2L)Exel7059/CyO
MI11374	S6k	Gold	3	Df(3L)BSC438/TM6C, Sb[1] cu[1]
MI11925	Src42A	Gold	2	Df(2R)BSC889/SM6a
MI12326	fry	Gold	3	Df(3L)BSC669/TM6C, Sb[1] cu[1]
MI12629	cic	Gold	3	Df(3R)ED6027/TM6C, cu[1] Sb[1]
MI13162	Rho1	Gold	2	Df(2R)ED2457/SM6a
MI13321	bmm	Gold	3	Df(3L)ED217/TM6C, cu[1] Sb[1]
MI13708	Cka*	Gold	2	P{ry[+t7.2]=PZ}Cka[05836] cn[1]/CyO
MI14321	shot	Gold	2	Df(2R)BSC383/CyO
MI14761	gig	Gold	3	Df(3L)BSC446/TM6C, Sb[1] cu[1]
MI15480	kn	Gold	2	Df(2R)BSC429/CyO
CRIMIC T2A-GAL4	Gene	Class	Chr.	DF genotype
CR00309	Drp1	Gold	2	Df(2L)C144/In(2LR)Gla
CR00322	BRWD3	Gold	3	Df(3R)BSC638/TM6C, cu[1] Sb[1]
CR00341	Surf4	Gold	3	Df(3R)ED5705/TM3, Ser[1]
CR00352	LamC	Gold	2	Df(2R)BSC357/CyO
CR00354	sax	Gold	2	Df(2R)BSC265/CyO
CR00362	pic	Gold	3	Df(3R)Exel6167/TM6B, Tb[1]
CR00449	bsf	Gold	2	Df(2L)BSC149/CyO
CR00452	sr	Gold	3	Df(3R)BSC510/TM6C, Sb[1] cu[1]
CR00465	Dap160	Gold	2	Df(2L)BSC302/CyO
CR00466	Eps-15	Gold	2	Df(2R)BSC606/SM6a
CR00492	Utx	Gold	2	Df(2L)BSC827/SM6a
CR00494	l(2)gd1	Gold	2	Df(2L)Exel6027/CyO
CR00521	Npc1a	Gold	2	Df(2L)BSC143/CyO
CR00559	Sod2	Gold	2	Df(2R)Exel7145/CyO
CR00565	ND-MWFE	Gold	2	Df(2R)Exel8057/CyO
CR00575	amd	Gold	2	Df(2L)Exel8040/CyO
CR00587	Hr38	Gold	2	Df(2L)ED1317/SM6a
CR00762	Wee1	Gold	2	Df(2L)BSC108/CyO
*: Df line is not availabile
				fail to complement
				partially complement
				complement

## Sheet: anti-bodies
Antibodies	RRID
anti-GFP-FITC	AB_305635
anti-Osa	AB_528420
anti-trio	AB_528494
anti-phalloidin-Alexa647	AB_2620155
anti-arm	AB_528089
